1 **RIPK1 Biallelic Activating Variants lead to Autoinflammatory Disease Driven by T cell Death**

2

3 Jialin Dai<sup>1,3,11</sup>, Taijie Jin<sup>2,3,11</sup>, Gaixiu Su<sup>4,11</sup>, Xu Han<sup>3</sup>, Jun Wang<sup>3</sup>, Chenlu Liu<sup>3</sup>, Wenjie Zheng<sup>5</sup>, Qiuye  
4 Zhang<sup>6</sup>, Jun Yang<sup>7</sup>, Li Guo<sup>8</sup>, Dan Zhang<sup>4</sup>, Ming Li<sup>4</sup>, Yingjie Xu<sup>4</sup>, Tong Yue<sup>4</sup>, Min Wen<sup>4</sup>, Jia Zhu<sup>4</sup>, Min  
5 Kang<sup>4</sup>, Jianming Lai<sup>4</sup>, Feifei Wu<sup>4</sup>, Shihao Wang<sup>3</sup>, Jiahui Zhang<sup>3</sup>, Pui Y. Lee<sup>9</sup>, Junying Yuan<sup>10\*</sup>, Xiaomin  
6 Yu<sup>1,2\*</sup>, Qing Zhou<sup>1,3\*</sup>

7

8 1 Liangzhu Laboratory of Zhejiang University, and Department of Rheumatology, Sir Run Run Shaw  
9 Hospital, Zhejiang University School of Medicine, Hangzhou, Zhejiang, China

10 2 Department of Rheumatology, The Second Affiliated Hospital, Zhejiang University School of Medicine,  
11 Hangzhou, Zhejiang, China

12 3 Life Sciences Institute, Zhejiang University, Hangzhou, Zhejiang, China

13 4 Department of Rheumatology and Immunology, Capital Institute of Pediatrics, Beijing, China

14 5 The Second Affiliated Hospital and Yuying Children's Hospital of Wenzhou Medical University,  
15 Wenzhou, Zhejiang, China

16 6 Department of Pediatric Nephrology, Rheumatology and Immunity, The Affiliated Hospital of Qingdao  
17 University, Qingdao, China

18 7 Department of Rheumatology and Immunology, Shenzhen Children's hospital, Shenzhen, China

19 8 Department of Rheumatology Immunology & Allergy, Children's Hospital, Zhejiang University School  
20 of Medicine, Hangzhou

21 9 Division of Immunology, Boston Children's Hospital, Harvard Medical School, Boston, MA, USA

22 10 Interdisciplinary Research Center on Biology and Chemistry, Shanghai Institute of Organic Chemistry,  
23 Chinese Academy of Sciences, Shanghai, China

24 11 These authors contributed equally: Jialin Dai, Taijie Jin, Gaixiu Su.

25 \*These authors jointly supervised this work: Qing Zhou, Xiaomin Yu, Junying Yuan.

26

27 **Corresponding authors**

28 \*E-mail: [zhouqingnwu@gmail.com](mailto:zhouqingnwu@gmail.com); [yuxiaomin78@gmail.com](mailto:yuxiaomin78@gmail.com); [junying\\_yuan@sioc.ac.cn](mailto:junying_yuan@sioc.ac.cn).

29

NOTE: This preprint reports new research that has not been certified by peer review and should not be used to guide clinical practice.

30

31 **Abstract**

32 Receptor-interacting serine/threonine-protein kinase 1 (RIPK1) is a key regulator of cell fate decision  
33 between pro-survival signaling and programmed cell death. The activation of RIPK1 is extensively  
34 modulated by posttranslational modification, such as ubiquitination. RIPK1 overactivation mediates  
35 autoinflammatory diseases in humans. However, the role of RIPK1 ubiquitination in human  
36 autoinflammatory diseases has not been reported, and the mechanism mediating the interaction of cell  
37 death and autoinflammation is largely unknown. Here, we report two patients carrying compound  
38 heterozygous *RIPK1* variants K377E/R390G with recurrent fevers, lymphadenopathy and skin rashes.  
39 Mechanistically, K377E and R390G mutations impaired ubiquitination of RIPK1, which suppresses the  
40 formation of TNFR1 signaling complex (TNF-RSC) and NF- $\kappa$ B activation, resulting in the loss of CD8<sup>+</sup>  
41 T cells mediated by RIPK1 activation-induced cell death in the patients. We reveal that the death of CD8<sup>+</sup>  
42 T cells promotes the secretion of TNF and IFN $\gamma$  to activate monocytes and macrophages, which triggers  
43 further production of proinflammatory cytokines to amplify autoinflammation. Disruption of the  
44 communication between T cells and monocytes/macrophages through pharmacologic blockade of TNF  
45 and IFN $\gamma$  attenuated proinflammatory cytokine production in macrophages. Collectively, our results  
46 demonstrate a crucial role of RIPK1 ubiquitination in regulating CD8<sup>+</sup> T cell death and restraining  
47 autoinflammation. Our study demonstrates the mechanism for a group of autoinflammatory diseases  
48 mediated by RIPK1 activation-induced cell death, and highlights an important role of CD8<sup>+</sup> T cells in  
49 driving autoinflammation.

## 50 Introduction

51 Systemic autoinflammatory diseases (SAIDs) are a group of disorders induced by overactivation of  
52 innate immune system characterized by recurrent fever and multi-organ inflammation, but typically  
53 without high-titer antibodies or antigen-specific T cells. Distinct from autoimmune diseases defined by  
54 dysregulation of the adaptive immune system, SAIDs are believed to be mostly driven by the malfunction  
55 of innate immune cells such as monocytes and neutrophils<sup>1,2</sup>. Therefore, the contribution of adaptive  
56 immune cells in triggering activation of myeloid cells has not been appreciated in the pathogenesis of  
57 SAIDs.

58 To date, more than 50 genes responsible for monogenic SAIDs have been identified. The list of  
59 genes whose mutations lead to SAIDs are enriched with key regulators of programmed cell death (PCD).  
60 Enhanced PCD is one of the characteristics in the SAID patients caused by the cleavage resistance  
61 mutations in *RIPK1*<sup>3-5</sup> or deficiencies of *RIPK1*<sup>6,7</sup>, TANK-binding kinase 1 (*TBKI*)<sup>8</sup>, OTU deubiquitinase  
62 with linear linkage specificity (*OTULIN*), HOIL1-interacting protein (*HOIP*), Heme-oxidized IRP2  
63 ubiquitin ligase-1 (*HOIL1*) and Shank-associated RH domain-interacting protein (*SHARPIN*)<sup>9</sup>.  
64 Pathogenic variants of these genes have been shown to activate apoptosis and necroptosis in cellular or  
65 murine models<sup>10</sup>. While excessive cell death is strongly linked to autoinflammatory diseases in humans,  
66 the mechanism by which cell death causes spontaneous inflammation in these conditions is unknown.

67 *RIPK1* is a key mediator of cell death and inflammation<sup>11</sup>. Overactivation of *RIPK1* leads to  
68 enhanced apoptosis, necroptosis and inflammatory response in mice and humans<sup>12</sup>. Whereas *RIPK1*  
69 deficiency and heterozygous non-cleavable variants in *RIPK1* cause immunodeficiency and dominantly  
70 inherited autoinflammatory diseases, respectively, a recessive autoinflammatory disease caused by  
71 *RIPK1* variants has not been reported. K63-linked ubiquitination of *RIPK1* on K377 is essential for NF-  
72  $\kappa$ B pathway activation and negative regulation of cell death. Mice bearing *Ripk1*<sup>K376R/K376R</sup> knockin  
73 mutation displays embryonic lethality due to excessive apoptosis and necroptosis caused by *RIPK1*  
74 activation<sup>13-15</sup>. Ablation of *Fadd* and *Mkl/Rip3* rescues the embryonic lethality and allows them to grow  
75 into fertile adults. Nevertheless, the function of *RIPK1* ubiquitination in human disease has not been  
76 defined and studied. In this study, we identified two autoinflammatory patients carrying recessively  
77 inherited compound heterozygous *RIPK1* variants K377E/R390G. We demonstrate that *RIPK1*  
78 K377E/R390G variants lead to autoinflammatory disease by prompting *RIPK1* activation-mediated the  
79 death of CD8<sup>+</sup> T cells.

## 80 **Results**

### 81 **Biallelic *RIPK1* mutations in patients with autoinflammation**

82 We identified two children from one family with autoinflammatory disease characterized by recurrent  
83 fevers, lymphadenopathy and skin rashes (Fig. 1a-d). The proband (Patient 1, P1) exhibited very early  
84 onset inflammatory bowel disease (VEO-IBD) characterized by diarrhea, abdominal pain and perianal  
85 abscess. At the age between 0-5, respectively, P1 and patient 2 (P2) displayed fever episodes that last 3-  
86 4 days and recurred every 8-9 days. Their fever episodes were accompanied by elevated serum C-reactive  
87 protein (CRP), serum amyloid A (SAA), erythrocyte sedimentation rate (ESR), D-dimer and lactate  
88 dehydrogenase (LDH) (Fig. 1e, Extended Data Fig. 1a-c). Neither case exhibited evidence of  
89 immunodeficiency or infection. In addition, the levels of pro-inflammatory cytokines IL-6 and TNF were  
90 strongly increased in the serum of both patients during flares (Fig. 1f). Serum CRP levels and adenosine  
91 deaminase (ADA) activity in patients were higher than that of unaffected controls and parents during  
92 disease flares and even in remission (Fig. 1f). P1 had taken prednisone during flares, with resolution of  
93 fever but limited effect on inflammatory indexes (Fig. 1e, Extended Data Fig. 1a-c).

94 By performing whole exome sequencing (WES) and sanger sequencing on the family, we identified  
95 that both P1 and P2 carried the *RIPK1* compound heterozygous mutations (c. 1129A>G / p. K377E and  
96 c. 1168C>G / p. R390G), whereas their unaffected mother and father were heterozygous carriers of  
97 *RIPK1* R390G and K377E, respectively (Fig. 1g, Extended Data Fig. 1d-e). Therefore, this  
98 autoinflammatory disease in the siblings appeared to be recessively inherited and segregated with the  
99 inheritance of both *RIPK1* variants. The lysine residue at amino acid position 377 is the site for K63-  
100 linked ubiquitination of RIPK1<sup>16</sup>, while the function of residue R390 has not been characterized. Both  
101 K377 and R390 residues are conserved in RIPK1 across species (Fig. 1h). The two *RIPK1* variants were  
102 predicted to be deleterious with their CADD scores well above that of the non-cleavable *RIPK1*  
103 mutations D324V, D324H and D324N (Extended Data Fig. 1f).

104

### 105 ***RIPK1* activating mutations impair ubiquitination of *RIPK1* and NF- $\kappa$ B activation and promote** 106 **cell death**

107 Given that RIPK1 is a widely expressed regulator of pro-survival NF- $\kappa$ B signaling and programmed cell  
108 death, we utilized SV40-immortalized human dermal fibroblasts (SV40-HDFs) derived from unaffected  
109 controls and P2 to assess the functional status of these signaling pathways. SV40-HDFs from P2 show

110 increased sensitivity to apoptosis induced by TNF (T) with cIAP1/2 degrader SM-164 (S) as well as  
111 necroptosis induced by TNF (T) with pan-caspase inhibitor z-VAD-FMK (Z) or TSZ (Fig. 1i, Extended  
112 Data Fig. 2a), and enhanced RIPK1 activation as shown by phosphorylation at S166 and that of MLKL  
113 as shown by phosphorylation at S358, which were rescued by the RIPK1 kinase inhibitor Necrostatin-1s  
114 (Nec-1s) (Fig. 1j, Extended Data Fig. 2a). These results suggest that the compound R390G and K377E  
115 mutations in RIPK1 promote the activation of RIPK1.

116 TNF-RSC is an important signaling complex that forms within minutes upon TNFR1 activation by  
117 TNF<sup>17</sup>. We next determined the effect of R390G and K377E compound mutations on TNF-RSC  
118 formation in SV40-HDFs upon stimulation with Flag-TNF. Ubiquitination of RIPK1 as well as  
119 recruitment of NEMO, IKK $\beta$  and SHARPIN to the TNF-RSC were impaired in P2 SV40-HDFs  
120 compared to unaffected controls (Fig. 1k). Furthermore, the activation of NF- $\kappa$ B and MAPK signaling  
121 by TNF were impaired in P2 SV40-HDFs as revealed by reduced phosphorylation of IKK $\alpha/\beta$ , p65, I $\kappa$ B $\alpha$ ,  
122 ERK and JNK (Fig. 1l).

123 The above findings were further investigated in *RIPK1*<sup>-/-</sup> HT-29 cell lines complemented with wild-  
124 type (WT), K377E and R390G RIPK1. K377E and R390G compound mutations sensitized HT-29 cells  
125 to RIPK1-dependent cell death (Extended Data Fig. 2b-c). Furthermore, *RIPK1*<sup>-/-</sup> HT-29 cells expressed  
126 K377E or R390G RIPK1 alone were also sensitized to TS and TSZ stimulation induced cell death to the  
127 same extent as that express both K377E and R390G (Fig. 1m-n, Extended Data Fig. 2d). Thus, K377E  
128 and R390G compound mutations or single mutation alone can promote cell death. Notably, the  
129 expression of K377E and R390G compound mutations or individual K377E and R390G mutation alone  
130 also reduced the levels of RIPK1 ubiquitination in TNF-RSC (Fig. 1o), as well as the activation of NF-  
131  $\kappa$ B and MAPK (Fig. 1p), and the production of downstream cytokines (Extended Data Fig. 2e).

132 K377 is a ubiquitination site in RIPK1 intermediate domain (ID domain)<sup>16</sup>. Consistently, K377E, but not  
133 R390G, directly abolished the ubiquitination of ID domain (Extended Data Fig. 2f). Since R390 is not  
134 expected to be the site of ubiquitination, we considered the possibility that R390G might affect the  
135 recruitment of E3 ubiquitination complexes. Mind Bomb-2 (MIB2) is known to be an E3 ubiquitin ligase  
136 recruited to TNF-RSC to mediate RIPK1 ubiquitination<sup>18</sup>. We found that the interaction between Mind  
137 Bomb-2 (MIB2) and RIPK1 R390G was demonstrated to be significantly reduced, which partly  
138 explained for the impaired ubiquitination of R390G RIPK1 (Extended Data Fig. 2g). Collectively, these  
139 data demonstrate that both K377E and R390G mutations promote RIPK1 activation-dependent cell death

140 and impaired pro-survival NF- $\kappa$ B signaling by modulating RIPK1 ubiquitination in TNF-RSC.

141

### 142 **Activation of inflammatory signaling in myeloid cells of the patients**

143 We next studied the inflammatory signaling pathways by performing single-cell RNA sequencing on  
144 peripheral blood mononuclear cells (PBMCs) from P1, P2 and three unaffected controls. The monocyte  
145 compartment in patients was significantly expanded (Fig. 2a, Extended Data Fig. 3a). Similar to the  
146 previously reported *RIPK1* D324V mutant<sup>4</sup>, transcriptional up-regulation of proinflammatory cytokines  
147 (*IL1B* and *CXCL8*) was detected in patient cells, especially in monocyte subsets (Fig. 2b). Likewise,  
148 differential gene expression analysis revealed greatest up-regulation of genes governed by NF- $\kappa$ B and  
149 type-I IFN pathways in myeloid cells from the patients (Fig. 2c-d, Extended Data Fig. 3b-c). The up-  
150 regulated genes in the patients' monocytes were also enriched for pathways of cytokine production,  
151 cytokine stimulation, and negative regulation of cell death in the gene ontology (GO) analysis (Fig. 2e,  
152 Extended Data Fig. 3d), suggesting that myeloid cells play a crucial role in increased cytokine production  
153 and pro-inflammatory signal transduction in the patients. Increased basal expression of IL-1 $\beta$ , IL-6 as  
154 well as IFN $\gamma$  in monocytes from P1 was confirmed by flow cytometry (Fig. 2f). However, monocytes  
155 isolated from the patients exhibited reduced transcription of NF- $\kappa$ B regulated genes including *IL1B*, *IL6*,  
156 *CXCL8* and *TNF* in response to TNF stimulation (Fig. 2g), in accordance with suppressed NF- $\kappa$ B  
157 activation in SV40-HDFs as demonstrated earlier (Fig. 1k, l). Thus, the increased inflammatory response  
158 of myeloid cells in the patients was likely represented a secondary effect triggered by K377E/R390G  
159 variants.

160 As RIPK1 overactivation can promote programmed cell death leading to inflammation<sup>19</sup>, we  
161 assessed the cell death response of monocytes to TNF stimulation. The monocytes from the patients were  
162 more sensitive to TS-induced apoptosis than that of unaffected controls, whereas they showed similar  
163 sensitivity to necroptosis induced by TSZ (Fig. 2h). In addition, no differences of apoptosis and  
164 necroptosis were observed between monocyte-derived macrophages (MDMs) from patients and that  
165 from unaffected controls (Fig. 2i, Extended Data Fig. 3e). On the other hand, although the expression of  
166 cell death suppressor genes *TNFAIP3*, *BCL2A1*, *BCL6*, *BCL3*, *RNF144B*, *BIRC2* and *BIRC3* were  
167 elevated in patients' various immune cell types, monocytes, LDG and DC cells express these genes  
168 significantly higher than that in lymphocyte subsets (Fig. 2j, k and Extended Data Fig. 3f). These results  
169 suggest that the elevated inflammatory response of monocytes induced by K377E/R390G variants may

170 be regulated non-autonomously by other cell types that were more susceptible to cell death.

171 To define the upstream factors that drove the overproduction of inflammatory cytokines in  
172 monocytes, we employed semi-quantitative protein microarray analysis on serum samples from  
173 unaffected controls and P2 (Fig. 2l-m). We collected samples before and after the first fever episode  
174 (disease onset) for P2. Differentially expressed cytokines were clustered into three groups according to  
175 the data trend. Twenty-eight cytokines in group 1 (such as IL-1 $\beta$ ) peaked during flare, reflecting a direct  
176 correlation with fever status (Fig. 2n, Extended Data Fig. 4a-b). 24 cytokines in group 2 (such as sCD95)  
177 (Fig. 2n, Extended Data Fig. 4c-d) and 32 cytokines in group 3 (Extended Data Fig. 4e-f) continuously  
178 changed across samples of P2. Up-regulated cytokines in group 2 were considered to be directly regulated  
179 by the *RIPK1* K377E/R390G mutations.

180 To further define the source of the cytokines in group 1 and 2, we compared the expression scores  
181 of the two groups between patients and unaffected controls by analyzing single cell RNA-seq data. The  
182 cytokines in group 1 were most significantly up-regulated in patients' monocytes, low-density  
183 granulocyte (LDG), plasmacytoid dendritic cell (pDC) and plasma cells (Fig. 2o), consistent with the  
184 strong inflammatory signature in myeloid cells during fever. Notably, the genes encoding cytokines in  
185 group 2 were up-regulated most significantly in the patients' lymphocyte subsets, especially in CD8<sup>+</sup> T  
186 cells (Fig. 2o), implying a pathogenic role of K377E/R390G variants in T lymphocytes. In addition, the  
187 expression levels of cell death suppressor genes in T lymphocytes were also lower compared with  
188 monocytes, LDG, pDC and plasma cells (Extended Data Fig. 3f), suggesting that T lymphocytes may be  
189 sensitized to undergo programmed cell death. Collectively, these results supported a critical role of  
190 monocytes in promoting inflammation and implied that T lymphocyte subsets may also contribute to the  
191 pathophysiology of this autoinflammatory disease.

192

### 193 **RIPK1 activation leads to increased cell death and CD4/CD8 ratio in T cells**

194 To better understand the impact of *RIPK1* mutations on immune profile, we performed cytometry by  
195 time-of-flight (CyTOF) on PBMCs isolated from unaffected controls and patients. CyTOF result revealed  
196 that CD4<sup>+</sup>T, B and  $\gamma\delta$  T cell proportions in patients were elevated whereas CD8<sup>+</sup> T and NK cell  
197 proportions were reduced comparing to unaffected controls (Extended Data Fig. 5a-b). Apoptosis  
198 indicated by cleaved caspase-3 was increased in CD8<sup>+</sup> TEMRA,  $\gamma\delta$ T, NK and B cell subsets of patients  
199 (Fig. 3a). Flow cytometric analysis confirmed that patients' CD4<sup>+</sup> and CD8<sup>+</sup> T cells, not CD19<sup>+</sup> B cells



200 and CD14<sup>+</sup> monocytes, displayed augmented activation of RIPK1 and cleaved caspase-3 (Fig. 3b-e,  
201 Extended Data Fig. 5c-f). Furthermore, CD3<sup>+</sup> T cells isolated from patients were more sensitive to TS-  
202 induced apoptosis and TSZ-induced necroptosis. They displayed higher levels of RIPK1 phosphorylation  
203 at S166 and MLKL phosphorylation at S358 comparing to that of unaffected controls, and these patterns  
204 were inhibited by treatment with Nec-1s (Fig. 3f-g), indicating that T cells bearing K377E/R390G  
205 mutations were more prone to RIPK1-dependent cell death. In accordance with the recessive inheritance,  
206 no significant differences of cell death were observed between unaffected parents carrying heterozygous  
207 mutation and unaffected controls.

208 The CyTOF results also revealed a global activation of patients' immune cells as indicated by CD69  
209 expression, while elevated CD38 expression appeared to be restricted to B cells and T cells (Extended  
210 Data Fig. 5g-h). Increased expression of CD69 in T cells was further validated by flow cytometry (Fig.  
211 3h). Concomitantly, higher levels of T cell activation-related proinflammatory mediators including  
212 sCD25, TNF and IFN $\gamma$  were observed in the serum of P1 and P2 as well as (cleavage-resistant RIPK1-  
213 induced autoinflammatory) CRIA patients (Fig. 3i). Activated lymphocytes undergo cell expansion and  
214 indeed we observed an elevation in the number of total lymphocytes, as well as that of CD3<sup>+</sup> T cells,  
215 CD4<sup>+</sup> T cells and B cells, except for that of cytotoxic CD8<sup>+</sup> T cells and NKT cells in the  
216 immunophenotyping results (Fig. 3j, Extended Data Fig. 6a). As a consequence of the loss of CD8<sup>+</sup> T  
217 cells, CD4/CD8 ratio was significantly increased in patients. *In vitro* expansion of T cells isolated from  
218 patients upon anti-CD3/CD28 stimulation were abnormal, but the proliferation ability was undampened  
219 (Fig. 3k-l), reflecting the occurrence of T cell death. Specifically, CD8<sup>+</sup> T cells went through a contraction  
220 phase after activation presumably resulted from activation-induced cell death (AICD)<sup>20</sup>. The augmented  
221 signal of CD95 (Fas) on the surface of patients' T cells accompanied by elevations of serum sCD95 and  
222 CD95L levels also supported increased AICD (Fig. 3i, m).

223 To further characterize the abnormalities in the patient T cells, we analyzed T cell subsets from *in*  
224 *vitro* cultured PBMCs. We observed that CD8 expression was decreased in approximate half of the CD8<sup>+</sup>  
225 T cells after culturing PBMCs isolated from P2 *in vitro* for 24 hours, while the expression on CD8<sup>+</sup> T  
226 cells of unaffected controls remained normal (Fig. 3n). Through gating on CD8<sup>hi</sup> (CD8<sup>+</sup> T cells with  
227 normal CD8 expression) or CD8<sup>lo</sup> (CD8<sup>+</sup> T cells with lower CD8 expression) T cells, we found that in  
228 contrast to CD8<sup>hi</sup> T cells, most of the CD8<sup>lo</sup> T cells exhibited augmented cleaved caspase-3 (Fig. 3n),  
229 indicative of activated apoptosis. In addition, total RIPK1 level in CD8<sup>lo</sup> T cells decreased which may be



230 caused by caspase-3 cleavage (Fig. 3n). The decreased CD8 expression in patients' T cells and the  
231 increases in CD4/CD8 ratio were more prominent after prolonged *in vitro* culture and after TS or TSZ  
232 stimulation compared to that of control (Fig. 3o, Extended Data Fig. 6b-d). The elevation of CD4/CD8  
233 ratio induced by TS or TSZ could be inhibited by RIPK1 kinase inhibitor or *in situ* knockin of WT *RIPK1*  
234 (Fig. 3p-q, Extended Data Fig. 6e-f). In contrast, neither ferroptosis induced by RSL3 nor RIPK1-  
235 independent apoptosis induced by staurosporine (STS) can differentiate cell death of CD8<sup>+</sup> T cells from  
236 the patients compared to that of unaffected controls (Extended Data Fig. 6g). In addition, the activation  
237 of patients' T cells by anti-CD3 antibody stimulation increased CD4/CD8 ratio, which could be reversed  
238 by ponatinib or partially reversed by Nec-1s (Fig. 3r-t). Since ponatinib inhibits the kinase activity of  
239 RIPK1 and RIPK3<sup>21</sup>, these results suggest that they might play important roles in regulating AICD in  
240 the patient T cells bearing K377E/R390G compound RIPK1 mutations. Together, these results suggested  
241 that T cells, especially CD8<sup>+</sup> T cells, were the most susceptible hematopoietic lineage to RIPK1-mediated  
242 cell death in patients with the *RIPK1* K377E/R390G variants.

243

#### 244 **RIPK1 activation-induced T cell death drives inflammation in myeloid cells**

245 Given the differential impact of the *RIPK1* K377E/R390G variants on T cells and monocytes, we next  
246 investigated cell-cell communication between these two cell types using a transwell system (Fig. 4a).  
247 The results showed that patients' T cells induced higher cytokine expression in MDMs comparing to that  
248 of T cells isolated from unaffected controls (Fig. 4b, c). However, MDMs from patients showed less  
249 response than that of unaffected controls upon culturing with the identical T cells. The impaired  
250 inflammatory response by patients' MDMs may be explained by the suppressed NF- $\kappa$ B activation caused  
251 by *RIPK1* K377E/R390G mutations. Interestingly, patients' T cells could still trigger massive cytokine  
252 production in autologous MDMs (Extended Data Fig. 7a). Thus, we conclude that increased cell death  
253 by T cells from the patients can act to potentiate the inflammatory response of monocytes and  
254 macrophages with *RIPK1* K377E/R390G mutations.

255 Previous studies have proposed TNF and IFN $\gamma$  secreted by chimeric antigen receptor (CAR) T cells  
256 as key contributors to the activation of macrophage during cytokine release syndrome (CRS)<sup>22</sup>. TNF  
257 combined with IFN $\gamma$  were also reported to be a key inducer of inflammation in patients with severe  
258 COVID-19<sup>23</sup>. Intriguingly, IFN $\gamma$  and TNF were specifically upregulated in patients' T lymphocytes and  
259 NK cells whereas receptors of these two cytokines were highly expressed in myeloid cells (Fig. 4d,

260 Extended Data Fig. 7b, c), providing additional support for T cell-monocyte/macrophage communication  
261 through these two receptor-ligand pairs. In comparison to unaffected controls, T cells, especially CD8<sup>+</sup>  
262 T cells from patients, exhibited greater production of IFN $\gamma$  and TNF. The production of these cytokines  
263 was further enhanced upon TS or TSZ stimulation (Fig. 4e, Extended Data Fig. 7d). These results  
264 indicated that IFN $\gamma$  and TNF produced by activated T cells may be the key factors to initiate the  
265 inflammatory response of MDMs. Consistently, increased production of *TNF*, *IL1B* and *IL6* in MDMs  
266 generated from unaffected controls stimulated by either patient T cells or anti-CD3/CD28-activated  
267 donor-matched T cells could be partially inhibited by neutralization of IFN $\gamma$  or TNF alone. The cytokine  
268 production was completely blocked by combined blockade of IFN $\gamma$  and TNF (Fig. 4f, Extended Data  
269 Fig. 7e). Collectively, these data demonstrated that RIPK1 overactivation in CD8<sup>+</sup> T cells promoted cell  
270 death as well as TNF and IFN $\gamma$  secretion to trigger inflammatory cytokine production in MDMs  
271 (Extended Data Fig. 7f).

272 In order to validate this model and assess whether the function of *RIPK1* K377E and R390G  
273 mutations in CD8<sup>+</sup> T cells was sufficient to induce inflammation, we exploited the Cre-loxp system  
274 combined with bone marrow transplantation to conditionally express WT or mutated human RIPK1 in  
275 specific hematopoietic compartments (Fig. 4g, Extended Data Fig. 8a). HSCs isolated from donor *Cd8a*-  
276 creERT2 mice or *Lyz2*-creERT2 mice were transduced with lentivirus encoding *EF1 $\alpha$* -promoted *loxp*-  
277 *GFP-stop-loxp-TagBFP2-P2A-human RIPK1* expression cassettes (*LSL-hRIPK1*). Afterwards,  
278 transduced HSCs were transplanted into lethally irradiated donor mice followed by tamoxifen induction.  
279 Transplantation efficiency and the specificities of *Cd8a* and *Lyz2* promoters were validated (Extended  
280 Data Fig. 8b-h). GFP expression in HSCs reflected transduction efficiency, and TagBFP2 confirmed  
281 WT/mutated RIPK1 expression in specific cell types upon tamoxifen induction (Extended Data Fig. 9a-  
282 d). We then evaluated the serum levels of inflammatory cytokines in the recipients. Under basal  
283 conditions, serum Tnf and Il-6 levels were higher in mice with Cd8 $\alpha$ <sup>+</sup> T cells expressing mutated RIPK1  
284 (K377E, R390G or D324V) than WT RIPK1 and empty vector (EV) controls (Fig. 4h). No significant  
285 differences were observed between mice bearing myeloid cells overexpressing EV/WT RIPK1 controls  
286 and mutated RIPK1 (Fig. 4i). The result demonstrated the pathogenic function of K377E and R390G as  
287 well as the initiator role of T cells in the autoinflammation. We also investigated the function of *RIPK1*  
288 K377E/R390G mutations in myeloid cells. As TLR4 is specially highly expressed in myeloid cells, we  
289 assessed the responsiveness of recipients to LPS at a nonlethal dose. The results showed that LPS

290 challenge led to elevation of Il-6 and Tnf in all groups. Recipients transplanted with HSCs expressing  
291 mutated RIPK1 (K377E, R390G or D324V) under the control of *Lyz2*, but not *Cd8a* promoter displayed  
292 higher serum level of inflammatory cytokines than WT and EV controls under LPS stimulation  
293 (Extended Data Fig. 9e-f), which is consistent with myeloid-specific inactivation of TAK1 that caused  
294 Ripk1 activation and cell death in mouse<sup>24</sup>.

295 *RIPK1* mutations at D324<sup>3,4</sup>, which could activate RIPK1-dependent cell death, have been reported  
296 to cause CRIA syndrome, respectively. Therefore, we examined the CD4/CD8 ratio and RIPK1 activation  
297 in CRIA patients (CRIA-1 and CRIA-2) to verify our model. Similar to patients with *RIPK1*  
298 K377E/R390G variants, we observed elevated CD4/CD8 ratio paired with increased RIPK1  
299 phosphorylation and cleaved caspase-3 in PBMCs from CRIA patients (Fig. 4j-m, Extended Data Fig.  
300 10a-b), indicating that CD8<sup>+</sup> T cell death might be a general phenomenon during the inflammation of  
301 CRIA. Notably, *in vitro* culture also induced decreased CD8 expression in CD8<sup>+</sup> T cells of CRIA-1  
302 (Extended Data Fig. 10c). CD4 and CD8 expression levels in CRIA patients' T cells were validated by  
303 CyTOF and CD8 expression decreased more in CD8<sup>+</sup> TEMRA cells than other subsets, reflecting higher  
304 levels of cell death in CD8<sup>+</sup> TEMRA cells (Extended Data Fig. 10d-g).

305

### 306 **Targeted therapies**

307 As TNF and IFN $\gamma$  were considered to mediate the inflammatory cytokine production of myeloid cells,  
308 we compared the treatment effectiveness of TNF inhibitor adalimumab with tocilizumab which blocks  
309 the signaling of IL-6 mainly produced by myeloid cells in patients (Fig. 4n-o). Both P1 and P2 responded  
310 to tocilizumab and showed marked alleviation of the elevated temperature and skin rashes and the  
311 inflammatory indexes including abnormal CRP, WBC, neutrophil and lymphocyte. However, the serum  
312 levels of TNF in both patients could not be suppressed by tocilizumab. TNF-targeting therapy is projected  
313 to partially interrupt the communication between T cells and monocytes/macrophages in our model. P2  
314 responded to anti-TNF therapy with reduced severity of the symptoms and decreased frequency of fevers.  
315 However, adalimumab had limited effects on WBC and lymphocyte counts as well as symptoms of P1  
316 as adalimumab alone was not enough to suppress serum levels of IL-6 (Fig. 4o), in accordance with the  
317 partial inhibitory effect of adalimumab on IL-6 produced by MDMs in the co-culture assay.

318

### 319 **Discussion**

320 This is the first report of biallelic mutations K377E/R390G in *RIPK1* leading to early-onset SAIDs with  
321 manifestations of periodic fever, intermittent lymphadenopathy, skin rashes and VEO-IBD. Mutation at  
322 K377 blocks K63-linked ubiquitination of RIPK1, while function of *RIPK1* R390 has not been reported.  
323 Here, we revealed that both K377E and R390G mutations lead to defects in TNF-RSC formation and  
324 activation of RIPK1, which promote cell death and inflammation. Since K377E and R390G are the  
325 recessive gain-of-function (GOF) mutations of *RIPK1*, as are the previously described caspase cleavage  
326 resistance variants, we termed these two conditions as “Gain-of-function *RIPK1* variants-induced  
327 autoinflammatory syndrome (GRIA)”.

328 The condition in our study is inherited in an autosomal recessive (AR) pattern, which is different  
329 from autosomal dominantly inherited CRIA syndrome even if they share similar manifestations.  
330 Mutation in *RIPK1* D324 does not impair NF- $\kappa$ B pathway<sup>3-5</sup>; in contrast, compound heterozygous  
331 mutations in *RIPK1* K377/R390 suppressed NF- $\kappa$ B activation, indicating that the autoinflammation  
332 caused by these mutations is not directly induced by dysregulation of NF- $\kappa$ B. The evidence that PBMCs  
333 and MEFs carrying heterozygous mutations in D324 as well as T cells carrying compound heterozygous  
334 variants in *RIPK1* K377/R390 instead of heterozygous variant are hypersensitive to TNF-induced cell  
335 death support the inheritance pattern of the two conditions<sup>3,4</sup>. Thus, excessive RIPK1-mediated cell death  
336 triggered by heterozygous D324 mutations or biallelic K377E and R390G mutations is supposed to be  
337 the inducer of autoinflammation. Mutations of genes such as *TBKI*<sup>8</sup>, *OTULIN*, *HOIP*, *HOIL1* and  
338 *SHARPIN*<sup>9</sup>, haven been shown to cause several SAIDs. Variants of these genes have been studied in  
339 murine models and are revealed to cause embryonic lethality attributed by enhanced cell death<sup>17,25-27</sup>. In  
340 contrast, patients with programmed cell death-driven SAIDs (PCD-driven SAIDs) only manifest periodic  
341 inflammation with excessive production of proinflammatory cytokines such as IL-6 and TNF.  
342 Overactivation of cell death has been observed in the cells derived from these patients, supporting an  
343 important role of cell death in the pathogenesis of SAIDs. However, how programmed cell death induces  
344 autoinflammation in human diseases remains uninvestigated.

345 Our study provides a mechanism that K377E/R390G variants of *RIPK1* induce CD8<sup>+</sup> T cell death  
346 to cause SAIDs. CD8<sup>+</sup> T cells bearing K377E/R390G have the propensity to be activated and expanded,  
347 and then enter the contraction phase induced by programmed cell death. During this process, CD8<sup>+</sup> T  
348 cells secrete massive TNF and IFN $\gamma$  which prime monocytes or macrophages to produce proinflammatory  
349 cytokines. The accumulation of the inflammatory cytokines such as group 2 cytokines secreted from

350 monocytes would induce the onset of fever. At the same time, inflammation accelerates the proliferation  
351 of T lymphocytes and autoinflammation with a positive feedback loop that amplifies the inflammatory  
352 reaction (Extended Data Fig. 7f). Eventually, inflammation is terminated with the decrease of activated  
353 CD8<sup>+</sup> T cells. Thus, we hypothesize that dynamics of CD4/CD8 ratio is correlated with the inflammatory  
354 state. Consistently, we captured once the resting stage before T cell expansion of P2 as well as CRIA-2  
355 with the normal ranges of WBC, lymphocyte counts and CD4/CD8 ratio. Therefore, increased CD4/CD8  
356 ratio combined with augmented RIPK1 activation in T cells are supposed to be biomarkers for PCD-  
357 driven inflammation. This evidence for diagnosis is verified in patients with CRIA syndrome. But it is  
358 worth noting that intensive gating strategy is required as CD8<sup>lo</sup> T cells representing the dying CD8<sup>+</sup> T  
359 cells may be considered as CD8<sup>+</sup> T cells by conventional gating strategy, leading to the falsely normal  
360 CD4/CD8 ratio. Since RIPK1 activation-induced AICD of T cells trigger the inflammation in SAID  
361 patients carrying *RIPK1* GOF variants, RIPK1 kinase inhibitors or RIPK1 proteolysis targeting chimeras  
362 degraders may provide a promising strategy for the treatment of SAID induced by RIPK1  
363 overactivation<sup>11</sup>.

364 GRIA syndrome is characterized by selective cell death of CD8<sup>+</sup> T cells as reflected by the elevation  
365 of CD4/CD8 ratio in peripheral lymphocytes. This process is remarkably similar to the contraction phase  
366 of CD8<sup>+</sup> T cells following infections as most effector CD8<sup>+</sup> T cells undergo programmed cell death after  
367 clonal expansion upon antigen-induced activation. Interestingly, intermittent fever with viremia has been  
368 shown to be correlated with CD4/CD8 ratio, which is similar to high CD4/CD8 ratio in K377E/R390G  
369 patients during flare<sup>28</sup>. Although the two diseases have completely different mechanism, it is worthwhile  
370 to note that almost 14 days were needed for CD8<sup>+</sup> T cells to undergo expansion and contraction upon  
371 antigen stimulation<sup>29</sup>, which is identical to the period of intermittent fever in GRIA patients.

372 Taken together, our findings provide a new insight that not only innate immune system, but also  
373 adaptive immune cells can play a causative role in the onset of SAIDs. We demonstrate that myeloid  
374 cells, such as monocytes and macrophages, act as executors of PCD-driven SAIDs for that they take  
375 responsibility to produce excessive cytokines to induce autoinflammation. This finding supports the  
376 notion that SAIDs is induced by dysregulation of innate immune system. In addition, we also highlight  
377 the essential role of T cells in PCD-driven SAIDs as they are the most sensitive hematopoietic  
378 compartments to cell death and has the predisposition to undergo AICD which motivate inflammatory  
379 response of myeloid cells, indicating the importance of cell-cell communication in pathogenesis of PCD-

380 driven SAIDs. Hence, blockade of communication between T cells and myeloid cells could be a  
381 promising therapeutic strategy for PCD-driven SAIDs.

382

### 383 **Acknowledgements**

384 We thank the patients, their families and the unaffected controls for their support during this research  
385 study. We also thank the core facility of the Life Sciences Institute, Zhejiang University, and core  
386 facilities of Liangzhu Laboratory, Zhejiang University. The works of Q.Z. were supported by grants  
387 82225022, 32141004 and 32321002 from the National Natural Science Foundation of China. The works  
388 of X.Y. were supported by the Hundred-Talent Program of Zhejiang University. J.D. received grant  
389 32300618 from the National Natural Science Foundation of China. J.W. received the grant 2023M733104  
390 from China Postdoctoral Science Foundation. L.G. received the grant LHDMY23H100005 from  
391 Zhejiang Provincial Natural Science Foundation of China.

392

### 393 **Author contributions**

394 Q.Z., X.Y., and J.Y. directed and supervised the research. J.D., T.J., and G.S. contributed equally. J.D.  
395 and T.J. designed the study, performed experiments and analyzed most of the data. X.H., J.W., and C.L.  
396 analyzed data. S.W. and J.Z. performed experiments. G.S., W.Z., Q.Z., J.Y., P.Y.L., D.Z., M.L., Y.X., T.Y.,  
397 M.W., J.Z., M.K., and J.L. enrolled the patients, collected and interpreted clinical information. J.D., T.J.,  
398 Q.Z., J.Y., and P.Y.L. wrote the manuscript, with input from others. All authors contributed to the review  
399 and approval of the manuscript.

400

### 401 **Competing interests**

402 J.Y. is a consultant of Denali Therapeutics. The rest of authors declare no competing financial interests.

403

### 404 **References**

- 405 1 Manthiram, K., Zhou, Q., Aksentijevich, I. & Kastner, D. L. The monogenic autoinflammatory  
406 diseases define new pathways in human innate immunity and inflammation. *Nat Immunol* **18**,  
407 832-842 (2017). <https://doi.org/10.1038/ni.3777>
- 408 2 Zhang, J., Lee, P. Y., Aksentijevich, I. & Zhou, Q. How to Build a Fire: The Genetics of  
409 Autoinflammatory Diseases. *Annu Rev Genet* (2023). [https://doi.org/10.1146/annurev-genet-](https://doi.org/10.1146/annurev-genet-030123-084224)  
410 [030123-084224](https://doi.org/10.1146/annurev-genet-030123-084224)
- 411 3 Lalaoui, N. *et al.* Mutations that prevent caspase cleavage of RIPK1 cause autoinflammatory

- 412 disease. *Nature* **577**, 103-108 (2020). <https://doi.org/10.1038/s41586-019-1828-5>
- 413 4 Tao, P. *et al.* A dominant autoinflammatory disease caused by non-cleavable variants of RIPK1.  
414 *Nature* **577**, 109-114 (2020). <https://doi.org/10.1038/s41586-019-1830-y>
- 415 5 Tapiz, I. R. A. J. *et al.* Characterization of Novel Pathogenic Variants Leading to Caspase-8  
416 Cleavage-Resistant RIPK1-Induced Autoinflammatory Syndrome. *J Clin Immunol* **42**, 1421-  
417 1432 (2022). <https://doi.org/10.1007/s10875-022-01298-2>
- 418 6 Cuchet-Lourenco, D. *et al.* Biallelic RIPK1 mutations in humans cause severe  
419 immunodeficiency, arthritis, and intestinal inflammation. *Science* **361**, 810-813 (2018).  
420 <https://doi.org/10.1126/science.aar2641>
- 421 7 Li, Y. *et al.* Human RIPK1 deficiency causes combined immunodeficiency and inflammatory  
422 bowel diseases. *Proc Natl Acad Sci U S A* **116**, 970-975 (2019).  
423 <https://doi.org/10.1073/pnas.1813582116>
- 424 8 Taft, J. *et al.* Human TBK1 deficiency leads to autoinflammation driven by TNF-induced cell  
425 death. *Cell* **184**, 4447-4463 e4420 (2021). <https://doi.org/10.1016/j.cell.2021.07.026>
- 426 9 Oda, H. *et al.* Human LUBAC deficiency leads to autoinflammation and immunodeficiency by  
427 dysregulation in TNF-mediated cell death. *medRxiv*, 2022.2011.2009.22281431 (2022).  
428 <https://doi.org/10.1101/2022.11.09.22281431>
- 429 10 Xu, D., Zou, C. & Yuan, J. Genetic Regulation of RIPK1 and Necroptosis. *Annu Rev Genet* **55**,  
430 235-263 (2021). <https://doi.org/10.1146/annurev-genet-071719-022748>
- 431 11 Mifflin, L., Ofengeim, D. & Yuan, J. Receptor-interacting protein kinase 1 (RIPK1) as a  
432 therapeutic target. *Nat Rev Drug Discov* **19**, 553-571 (2020). <https://doi.org/10.1038/s41573-020-0071-y>
- 433
- 434 12 Degtarev, A., Ofengeim, D. & Yuan, J. Targeting RIPK1 for the treatment of human diseases.  
435 *Proc Natl Acad Sci U S A* **116**, 9714-9722 (2019). <https://doi.org/10.1073/pnas.1901179116>
- 436 13 Tang, Y. *et al.* K63-linked ubiquitination regulates RIPK1 kinase activity to prevent cell death  
437 during embryogenesis and inflammation. *Nat Commun* **10**, 4157 (2019).  
438 <https://doi.org/10.1038/s41467-019-12033-8>
- 439 14 Zhang, X. *et al.* Ubiquitination of RIPK1 suppresses programmed cell death by regulating  
440 RIPK1 kinase activation during embryogenesis. *Nat Commun* **10**, 4158 (2019).  
441 <https://doi.org/10.1038/s41467-019-11839-w>
- 442 15 Kist, M. *et al.* Impaired RIPK1 ubiquitination sensitizes mice to TNF toxicity and inflammatory  
443 cell death. *Cell Death Differ* **28**, 985-1000 (2021). <https://doi.org/10.1038/s41418-020-00629-3>
- 444 3
- 445 16 Ea, C. K., Deng, L., Xia, Z. P., Pineda, G. & Chen, Z. J. Activation of IKK by TNFalpha requires  
446 site-specific ubiquitination of RIP1 and polyubiquitin binding by NEMO. *Mol Cell* **22**, 245-257  
447 (2006). <https://doi.org/10.1016/j.molcel.2006.03.026>
- 448 17 Xu, D. *et al.* TBK1 Suppresses RIPK1-Driven Apoptosis and Inflammation during  
449 Development and in Aging. *Cell* **174**, 1477-1491 e1419 (2018).  
450 <https://doi.org/10.1016/j.cell.2018.07.041>
- 451 18 Feltham, R. *et al.* Mind Bomb Regulates Cell Death during TNF Signaling by Suppressing  
452 RIPK1's Cytotoxic Potential. *Cell Rep* **23**, 470-484 (2018).  
453 <https://doi.org/10.1016/j.celrep.2018.03.054>
- 454 19 Zhu, K. *et al.* Necroptosis promotes cell-autonomous activation of proinflammatory cytokine  
455 gene expression. *Cell Death Dis* **9**, 500 (2018). <https://doi.org/10.1038/s41419-018-0524-y>



- 456 20 Badovinac, V. P., Porter, B. B. & Harty, J. T. Programmed contraction of CD8(+) T cells after  
457 infection. *Nat Immunol* **3**, 619-626 (2002). [https://doi.org:10.1038/ni804](https://doi.org/10.1038/ni804)
- 458 21 Martens, S., Hofmans, S., Declercq, W., Augustyns, K. & Vandenabeele, P. Inhibitors Targeting  
459 RIPK1/RIPK3: Old and New Drugs. *Trends Pharmacol Sci* **41**, 209-224 (2020).  
460 [https://doi.org:10.1016/j.tips.2020.01.002](https://doi.org/10.1016/j.tips.2020.01.002)
- 461 22 Morris, E. C., Neelapu, S. S., Giavridis, T. & Sadelain, M. Cytokine release syndrome and  
462 associated neurotoxicity in cancer immunotherapy. *Nat Rev Immunol* **22**, 85-96 (2022).  
463 [https://doi.org:10.1038/s41577-021-00547-6](https://doi.org/10.1038/s41577-021-00547-6)
- 464 23 Karki, R. *et al.* Synergism of TNF-alpha and IFN-gamma Triggers Inflammatory Cell Death,  
465 Tissue Damage, and Mortality in SARS-CoV-2 Infection and Cytokine Shock Syndromes. *Cell*  
466 **184**, 149-168 e117 (2021). [https://doi.org:10.1016/j.cell.2020.11.025](https://doi.org/10.1016/j.cell.2020.11.025)
- 467 24 Malireddi, R. K. S. *et al.* TAK1 restricts spontaneous NLRP3 activation and cell death to control  
468 myeloid proliferation. *J Exp Med* **215**, 1023-1034 (2018).  
469 [https://doi.org:10.1084/jem.20171922](https://doi.org/10.1084/jem.20171922)
- 470 25 Kelliher, M. A. *et al.* The death domain kinase RIP mediates the TNF-induced NF-kappaB  
471 signal. *Immunity* **8**, 297-303 (1998). [https://doi.org:10.1016/s1074-7613\(00\)80535-x](https://doi.org/10.1016/s1074-7613(00)80535-x)
- 472 26 Peltzer, N. *et al.* LUBAC is essential for embryogenesis by preventing cell death and enabling  
473 haematopoiesis. *Nature* **557**, 112-117 (2018). [https://doi.org:10.1038/s41586-018-0064-8](https://doi.org/10.1038/s41586-018-0064-8)
- 474 27 Bonnard, M. *et al.* Deficiency of T2K leads to apoptotic liver degeneration and impaired NF-  
475 kappaB-dependent gene transcription. *EMBO J* **19**, 4976-4985 (2000).  
476 [https://doi.org:10.1093/emboj/19.18.4976](https://doi.org/10.1093/emboj/19.18.4976)
- 477 28 Murakami, K., Sentsui, H., Shibahara, T. & Yokoyama, T. Reduction of CD4+ and CD8+ T  
478 lymphocytes during febrile periods in horses experimentally infected with equine infectious  
479 anemia virus. *Vet Immunol Immunopathol* **67**, 131-140 (1999). [https://doi.org:10.1016/s0165-  
480 2427\(98\)00225-6](https://doi.org/10.1016/s0165-2427(98)00225-6)
- 481 29 Prlic, M. & Bevan, M. J. Exploring regulatory mechanisms of CD8+ T cell contraction. *Proc*  
482 *Natl Acad Sci U S A* **105**, 16689-16694 (2008). [https://doi.org:10.1073/pnas.0808997105](https://doi.org/10.1073/pnas.0808997105)
- 483

484 **Methods**

485 **Patients**

486 Patients (P1 and P2; CRIA-1 and CRIA-2) were evaluated under protocols approved by Institutional  
487 Review Board and Ethical Committee at the Children's Hospital of Zhejiang University School of  
488 Medicine (protocol 2021-IRB-172). P1 and P2 were evaluated at Children's Hospital affiliated to the  
489 Capital Institute of Pediatrics. All relevant ethical regulations were followed. All patients provided  
490 written informed consent.

491

492 **Whole exome sequencing and genotyping with sanger sequencing**

493 Whole blood genomic DNA was extracted using Maxwell RSC Whole Blood DNA Kit (Promega,  
494 AS1520) and 1 µg DNA was used for whole-exome sequencing. WES and data analysis were performed  
495 as previously described<sup>4</sup>. For genotyping of other affected or unaffected family members, 437 bp  
496 genomic DNA fragment containing *RIPK1* K377/R390 was amplified with forward primer 5'-TTGAGA  
497 TACAGATTCATGACGGCG-3' and reverse primer 5'-CTGGTGCCTGCATTACCATGAC-3' for  
498 sanger sequencing. For genotyping of CRIA patients, 514 bp genomic DNA fragment containing *RIPK1*  
499 D324 was amplified with forward primer 5'-AAATCAGGAAGTGTGAGTCCTACAACC-3' and  
500 reverse primer 5'-TGTTTCAGAACACTCTATGACTGGTGAG-3' for sanger sequencing.

501

502 **Single-cell RNA sequencing**

503 PBMCs of patient 1 and patient 2 were freshly isolated and 10000 single-cell were captured by 10X  
504 Genomics Chromium for cDNA library preparation according to the manufacturer's instruction.  
505 Sequencing was carried out on Illumina NovaSeq PE150 platform by Novogene Company (Beijing,  
506 China). The resulting count matrices followed the standard pipeline with default parameters. Further data  
507 analysis was performed as previously described<sup>4</sup>.

508

509 **Cell lines, cell isolation, culture and stimulation**

510 The HEK293T cell line was from the American Type Culture Collection (ATCC). Human PBMC samples  
511 were generated from peripheral blood samples using gradient centrifuging with LSM™ lymphocyte  
512 separation medium (MP Bio, Cat.50494X). Then primary T lymphocytes and monocytes were isolated  
513 from PBMCs by negative selection using Pan T Cell Isolation Kit (Miltenyi Biotec, 130-096-535) and

514 Pan Monocyte Isolation Kit (Miltenyi Biotec, 130-096-537) according to manufacturer's instructions.  
515 SV40-HDFs were derived from skin biopsies of patient or control donors as described and transformed  
516 by lentiviral transduction of SV40-large T antigen.  
517 The HEK293T cells, SV40-HDFs were cultured in Dulbecco's Modified Eagle Medium (DMEM, Gibco)  
518 supplemented with 10% FBS. Human PBMCs, primary T cells and monocytes were cultured in RPMI  
519 1640 (Gibco) supplemented with 10% FBS. HT-29 cells were cultured in McCoy's 5A medium (Gibco)  
520 supplemented with 10% FBS.  
521 Recombinant human TNF (Peprotech, 300-01A) was used to stimulate HT-29 cells (20 ng ml<sup>-1</sup>), SV40-  
522 HDFs (20 ng ml<sup>-1</sup>) and human primary monocytes (50 ng ml<sup>-1</sup>) for the indicated times. z-VAD-fmk  
523 (Selleck, S7023, 25 μM), SM-164 (Selleck, S7089, 250 nM) and Nec-1s (Selleck, S8641, 10 μM) were  
524 used to treat HT-29 cells, human primary T cells and monocytes. Staurosporine (MCE, HY-15141, 100  
525 nM) and RSL3 (Selleck, S8155, 1 μM) were used to induce apoptosis or ferroptosis in T cells.

526

#### 527 **Flow cytometry**

528 Cells were washed with FACS buffer (0.5% BSA in PBS) and blocked with human Fc Block (BD  
529 Biosciences, 564219) followed by staining with antibodies against surface molecules in dark for 30 min  
530 at 4 °C. Then cells were washed twice and stained with Fixable Viability Stain 780 (BD Biosciences,  
531 565388) to distinguish live versus dead cell. For intracellular staining, cells were fixed and permeabilized  
532 with BD Phosflow™ Fix Buffer and Perm Buffer (BD Biosciences: 557870, 558052) and then washed  
533 twice and stained with antibodies against intracellular antigens for 30 min at 4 °C. For pRIPK1 (Ser166)  
534 and cleaved caspase-3 staining, cells were incubated with Alexa Fluor 647 labeled goat anti-rabbit IgG  
535 (Thermo, A-21244) for 30 min at 4°C after primary antibody staining. Cells were acquired on CytoFlex  
536 (Beckman) and data were analyzed using FlowJo software. The following antibody clones were used for  
537 staining in flow cytometry analysis: CD3 (SK7, BD Biosciences), CD4 (RPA-T4, BD Biosciences), CD8  
538 (RPA-T8, BD Biosciences), CD14 (M5E2, BD Biosciences), CD16 (3G8, BD Biosciences), CD19  
539 (SJ25C1, BD Biosciences), CD56 (NCAM16.2, BD Biosciences), IL-1β (JK1B-1, BioLegend), TNF  
540 (MAb11, BD Biosciences), IL-6 (MQ2-13A5, BD Biosciences), IFNγ (4S.B3, BD Biosciences), Cleaved  
541 Caspase-3 (Asp175) (CST, #9661), pRIPK1(Ser166) (D8I3A, CST), RIPK1 (D94C12, CST).

542

#### 543 **RNA isolation and real-time RT-PCR**

544 Total RNA from cells was extracted using a RNeasy Mini Kit (Qiagen, 74104) according to the  
545 manufacturer's instructions. 1 µg RNA was reverse transcribed into cDNA with ReverTra Ace® qPCR  
546 RT Master Mix (TOYOBO, FSQ-301). cDNA was then diluted and used for real-time PCR using 2x  
547 Universal SYBR Green Fast qPCR Mix (Abclonal, RK21203) with primers targeting *IL1B* (F, 5'-  
548 TGCTCTGGGATTCTCTTCAGC-3'; R, 5'-AAGTCATCCTCATTGCCACTGT-3'), *IL6* (F, 5'-  
549 CATCCTCGACGGCATCTCAG-3'; R, 5'-ACCAGGCAAGTCTCCTCATTG-3'), *IL8* (F 5'-  
550 CCAAACCTTTCCACCCCAA-3'; R, 5'-GAATTCTCAGCCCTCTTCAAAAAC-3') *TNF* (F, 5'-  
551 CTCTTCTGCCTGCTGCACTTTG-3'; R, 5'-ATGGGCTACAGGCTTGTCACCT-3'), and *GAPDH* (F,  
552 5'-TCGACAGTCAGCCGCATCTTC-3'; R, 5'-GCGCCCAATACGACCAAATCC-3'). Relative  
553 transcription levels were calculated by normalization to *GAPDH* mRNA.

554

#### 555 **Cell viability assay and cell death assay**

556 Primary T cells (15000 cells/well), SV40-HDFs (2000 cells/well) or HT-29 (5000 cells/well) were plated  
557 in 384-well plate and were stimulated with indicated conditions. General cell viability was measured by  
558 using CellTiter-Glo® Luminescent Cell Viability Assay (Promega, G7572) according to the  
559 manufacturer's instructions. The percentage of viability was normalized to untreated controls. Cell death  
560 detection was performed by direct staining with 0.5 µg/ml Propidium Iodide (PI) and 0.5 µg/ml DAPI  
561 for 10 min and imaging with fluorescence microscope. PI positive dead cell was counted and normalized  
562 to DAPI counts. For continuous cell death measurement, cells were simulated with indicated conditions  
563 and stained with 200 nM Hoechst 33342 (Beyotime, C1022) and 200 nM SYTOX™ Orange (Thermo,  
564 S34861) at the same time. The percentage of dead cell was assayed every 1 hour by imaging with BioTek  
565 Cytation 3 for 18 hours with 5% CO<sub>2</sub> and 37 °C condition. Results were exported as counts per well to  
566 be processed and graphed using Prism 9.

567

#### 568 **Protein array**

569 Semiquantitative analysis of 174 cytokine levels of P2's serum samples before (normal stage) or after  
570 (onset, non-flare) the first onset of fever was performed with human Cytokine Array G2000 (RayBiotech)  
571 by Novogene Company (Beijing, China). Generally, the cytokine array glass slides were firstly blocked  
572 for 1 hour at room temperature and then incubated with 100 µl serum samples at 4 °C overnight. On the  
573 second day, the slides were washed with wash buffer and incubated with Biotin-Conjugated Anti-

574 Cytokines and HiLyte Plus™ 555 Streptavidin-Fluor according to the manufacturer's instructions. The  
575 results were scanned with InnoScan 300 Microarray Scanner (Innopsys) at 532 nm with 10 µm resolution.  
576 The mean fluorescence intensity (MFI) was calculated and exported for further analysis.

577

#### 578 **Human and mouse cytokines measurement**

579 Human or mouse serum cytokines were measured by enzyme-linked immunosorbent assay (ELISA)  
580 (Multi Sciences: 70-EK1280, 70-EK194, 70-EK182HS, 70-EK106HS, 70-EK191, 70-EK180HS, 70-  
581 EK1F01, 70-EK1F02, EK206HS, EK282HS/2) according to the manufacturer's instructions. T cell  
582 culture supernatant cytokines were determined by Cytometric Bead Arrays (BD Biosciences) according  
583 to the manufacturer's instructions. Human serum adenosine deaminase (ADA) activity was measured  
584 with Boyle colorimetric method by using ADA Activity Assay Kit (Yuanye Bio, R22207) according to  
585 the manufacturer's instructions. Student's t-test was performed for the statistical analysis.

586

#### 587 ***In vitro* cell proliferation assay**

588 Fresh isolated CD3<sup>+</sup> T cells were labeled with CFSE (Thermo, 65-0850-84, 5 µM) and then stimulated  
589 with anti-CD3/CD28 beads (T&L Biotechnology) at 1:1 ratio supplemented with hrIL-7 (PrimeGene)  
590 and hrIL-15 (PrimeGene) in 48-well plates for 96 hours. Then all cells were co-stained with CD4-BB515  
591 and CD8-BV510 antibodies and analyzed using CytoFlex (Beckman).

592

#### 593 **Gene editing of patient T cells**

594 Primary T cells isolated from patients were stimulated with anti-CD3/CD28 beads for 3 days. For  
595 electroporation, 180 pmol sgRNA and 25 µg Cas9 protein were mixed and incubated for 15 min at room  
596 temperature for ribonucleoprotein complexes (RNP) formation. Then 3e6 T cells resuspended in opti-  
597 MEM were mixed with RNP and 6 µg dsDNA template and electroporated using Gemini X2 (BTX)  
598 under the #905 program for human primary T cells. After electroporation, 1 ml warm X-VIVOTM 15  
599 Serum-free Hematopoietic Cell Medium (Lonza) supplemented with 10% FBS was immediately added  
600 to the cuvette and the mixture was then carefully transferred to 24-well plates for further culture and  
601 analysis.

602

#### 603 **T cell-MDM co-culture assay**

604 Freshly isolated monocytes were seeded in 24-well plate and differentiated into monocyte-derived  
605 macrophages (MDMs) with 20 ng/ml GM-CSF treatment for 10 days. Then, 0.4  $\mu$ m pore polycarbonate  
606 membrane inserts containing T cells isolated from PBMCs of patient or healthy donors were placed into  
607 the 24-well plate for the T cell-MDM co-culture at the ratio of 5:1 for 8 hours. Finally, T cells were  
608 removed and bottom MDMs were collected for mRNA extraction.

609

#### 610 **Mice**

611 All mouse studies complied with relevant ethical regulations and approved by Institutional Animal Care  
612 and Use Committee (IACUC) of the Zhejiang University (Registration No.:27043). The *Cd8a-creERT2*  
613 and *Lyz2-creERT2* strains on C57BL/6J background were purchased from GemPharmatech. The *Rosa26-*  
614 *mTmG* strain on C57BL/6J background was purchased from Cyagen. All mice were maintained under  
615 specific pathogen-free condition with free access to food and water at Laboratory Animal Center of  
616 Zhejiang University.

617

#### 618 **HSC isolation, transduction, transplantation, induction and LPS challenge**

619 Mouse hematopoietic stem cells (HSC) were isolated from 6- to 8-week-old donor mice using Lineage  
620 cell depletion kit (Miltenyi Biotec, 130-090-858) according to manufacturer's instruction. HSCs were  
621 plated in 12-well plate and were transduced with lentivirus carrying human RIPK1 inducible expression  
622 system (MOI=50). Transduction efficiencies were measured with flow cytometry after 24 hours culturing  
623 and 200,000 of transduced HSCs were transplanted into lethally irradiated (4 Gy, 2 times) recipient mice  
624 (female, 8 to 12 weeks old). Transplantation efficiencies were validated by flow cytometry analysis after  
625 2 weeks. Successfully transplanted mice were injected i.p with 20 mg/ml tamoxifen (MCE, HY-13757A)  
626 dissolved in corn oil (MCE, HY-Y1888) every two days for 5 times to induce the expression of WT,  
627 K377E, R390G or D324V mutated RIPK1. Then, these mice were injected i.p with 0.5 mg/kg  
628 lipopolysaccharide (LPS) (Sigma, L6529) and serum were collected before injection or injected for 2  
629 hours. Serum Il6 and Tnf were measured by ELISA as described.

630

#### 631 **Immunoprecipitation and western blot**

632 For TNFR signaling complex (TNF-RSC) enrichment, 5e6 cells were seeded and treated with flag tagged  
633 TNF (ENZO, ALX-522-008) for indicated times. The samples were immediately washed with cold PBS

634 and lysed in cold lysis buffer (25 mM Tris-HCl, pH 7.4, 150 mM NaCl, 0.5% NP-40, 10% glycerol) with  
635 freshly added inhibitors blocking protease and phosphatase (Merck: 4906837001, 4693159001) for 30  
636 min. Then samples were cleared through centrifugation at 20000 RCF for 10 min and protein  
637 concentrations were determined by Pierce™ BCA Protein Assay Kits (Thermo, 23225). Then the TNF-  
638 RSC was immunoprecipitated with FLAG M2 magnetic beads (Sigma, M8823) at 4 °C for 4 hours and  
639 the protein complex was directly eluted by boiling in 1×SDS loading buffer. For TNF downstream  
640 signaling analysis, 4e5 cells were seeded and treated as indicated and then cells were harvested and lysed  
641 directly with sample loading buffer. These samples were separated through routine SDS-PAGE and  
642 transferred to 0.45 μm nitrocellulose membrane (Cytiva, 10600002) and blotted with indicated antibodies.  
643

#### 644 **CyTOF**

645 PBMCs were freshly isolated from whole bloods of four patients (P1 and P2; CRIA-1 and CRIA-2) and  
646 four unaffected controls, then blocked and labeled with conjugated antibodies as described<sup>31</sup>. Fixed cell  
647 samples were resuspended and analyzed on a mass cytometer (Helios, Fluidigm). The CyTOF data exported  
648 as FCS files were gated in FlowJo (v10.0.7) to remove doublets and CD45<sup>+</sup> single cells identified by  
649 DNA (<sup>191</sup>Ir and <sup>193</sup>Ir), <sup>194</sup>Pt and event length. For downstream analysis, 10,000 cells were randomly  
650 selected from each sample. The raw values of FCS files were transformed using the arcsinh function  
651 with a cofactor of 5. Phenograph clustering in cytofkit R package was performed on all subsampled  
652 sample events and the transformed values of all events were subjected to t-SNE dimension reduction  
653 using R-tsne package<sup>32,33</sup>.

654

#### 655 **Antibodies**

656 The following antibodies were purchased from Cell Signaling Technology: pRIPK1 (S166) (65746),  
657 RIPK1 (3493), pMLKL (S358) (91689), MLKL (14993), pIKKα/β (S176/180) (2697), IKKβ (2370),  
658 Sharpin (12541), pp65 (S65) (3033), p65 (8242), pIκBα (S32) (2859), IκBα (4814), pERK1/2  
659 (T202/Y204) (4370), ERK1/2 (4695), pJNK (T183/Y185) (9251), JNK (9252), HA (3724), cleaved  
660 caspase-3 (D175) (9661), caspase-3 (9662). NEMO (sc-8330) was purchased from Santa Cruz  
661 Biotechnology. GAPDH (SA30-01) was purchased from HUABIO.

662

#### 663 **Data availability**



664 The raw data of sequencing will be available prior to publication. The other source data that support the  
665 findings of this study are available from the corresponding author upon reasonable request.

666

667 30 Carmona-Rivera, C. & Kaplan, M. J. Induction and Quantification of NETosis. *Curr Protoc*  
668 *Immunol* **115**, 14 41 11-14 41 14 (2016). <https://doi.org:10.1002/cpim.16>

669 31 Wang, Y. *et al.* Identification of an IL-1 receptor mutation driving autoinflammation directs IL-  
670 1-targeted drug design. *Immunity* **56**, 1485-1501 e1487 (2023).  
671 <https://doi.org:10.1016/j.immuni.2023.05.014>

672 32 Levine, J. H. *et al.* Data-Driven Phenotypic Dissection of AML Reveals Progenitor-like Cells  
673 that Correlate with Prognosis. *Cell* **162**, 184-197 (2015).  
674 <https://doi.org:10.1016/j.cell.2015.05.047>

675 33 Chen, H. *et al.* Cytokit: A Bioconductor Package for an Integrated Mass Cytometry Data  
676 Analysis Pipeline. *PLoS Comput Biol* **12**, e1005112 (2016).  
677 <https://doi.org:10.1371/journal.pcbi.1005112>

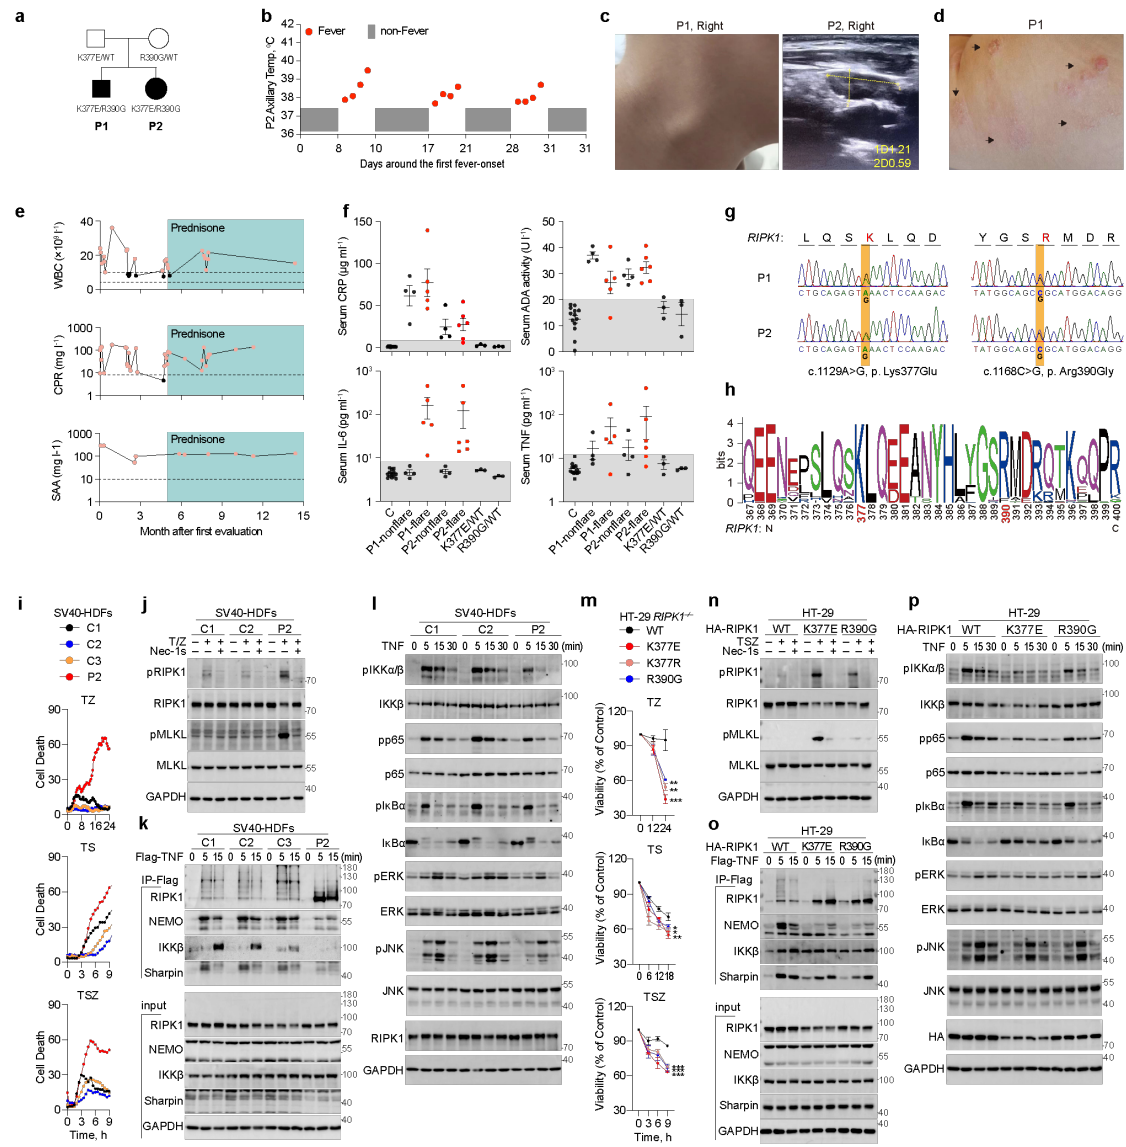

678

679 **Fig. 1** | Compound heterozygous gain-of-function mutations in *RIPK1* causes systemic autoinflammatory  
 680 diseases.

681 **a**, Pedigrees of a family with two patients carrying mutations at *RIPK1* K377 and R390. Patient 1 (P1)  
 682 and patient 2 (P2) were represented with filled symbols. **b**, Timeline of recurrent fever episodes in P2  
 683 over 5 weeks. Red dots represented increased temperatures during fever episodes and grey boxes  
 684 represent the normal temperatures between flares. **c**, Representative sonographic image showing  
 685 lymphadenopathy of P2. The diameters of right cervical lymph nodes were marked with dotted yellow  
 686 line. **d**, Representative macroscopic image of dermatological manifestations in P1 during acute phase  
 687 reaction, showing skin rashes (arrows). **e**, Whole blood cell counts (WBC), C-reactive protein (CRP) and  
 688 serum amyloid A protein (SAA) were measured serially after the first evaluation of P1 and prednisone  
 689 treatment (cyan shading) started at the age between 0-5. Horizontal dotted lines indicate age-specific

690 high values for CRP, SAA or high and low values for WBC count. Red dots donate the abnormal values.  
691 **f**, C-reactive protein (CRP), serum ADA enzymatic activity and IL-6, TNF levels of unaffected controls  
692 (C, n=13), P1 during prednisone treatment (4 samples taken during flare and 5 samples taken during non-  
693 flare), P2 (4 samples taken during flare and 6 samples taken during non-flare), unaffected parents  
694 carrying heterozygous K377E mutation (K377E/WT, 1 sample from I-2 and 2 samples from II-2) or  
695 R390G mutation (R390G/WT, 3 samples from II-3). **g**, Sanger sequencing chromatograms of *RIPK1*  
696 showed heterozygous base substitutions at p. K377E and p. R390G in whole blood genomic DNA from  
697 P1 and P2. **h**, WebLogo demonstrating conservation of human *RIPK1* K377 and R390 across 42  
698 vertebrate species. **i-i**, Cell death of SV40-immortalized human dermal fibroblasts (SV40-HDFs) isolated  
699 from three unaffected controls (C1-C3) and P2 were monitored by continuous imaging of SYTOX™  
700 Orange staining. The SV40-HDFs were treated with T, S, Z as indicated (**i**). SV40-HDFs was treated  
701 with TZ with or without Nec-1s (10 μM) for 12 hours and immunoblotted with indicated antibodies (**j**).  
702 The TNFR signaling complex (TNF-RSC) were immunoprecipitated with Flag-TNF for 5 or 15 min and  
703 immunoblotted with indicated antibodies (**k**). NF-κB and MAPK activation of SV40-HDFs treated with  
704 TNF for 5, 15 or 30 min immunoblotted with indicated antibodies (**l**). **m-p**, *RIPK1*<sup>-/-</sup> HT-29 cells were  
705 lentivirally complemented with HA-RIPK1 wild-type (WT), K377E, R390G and treated with T, S, Z as  
706 indicated. Cell viability was measured by CellTiter-Glo luminescent cell viability assay (**m**). The  
707 necroptosis markers (**n**), TNF-RSC (**o**) and the NF-κB and MAPK activation (**p**) were analyzed in the  
708 same way. T denotes 20 ng ml<sup>-1</sup> TNF; S denotes 250 nM SM-164; Z denotes 25 μM z-VAD-fmk. Graphs  
709 show mean±SD. Statistical significance was determined by one-way ANOVA (**m**), \*\*P < 0.01, \*\*\*P <  
710 0.001.  
711

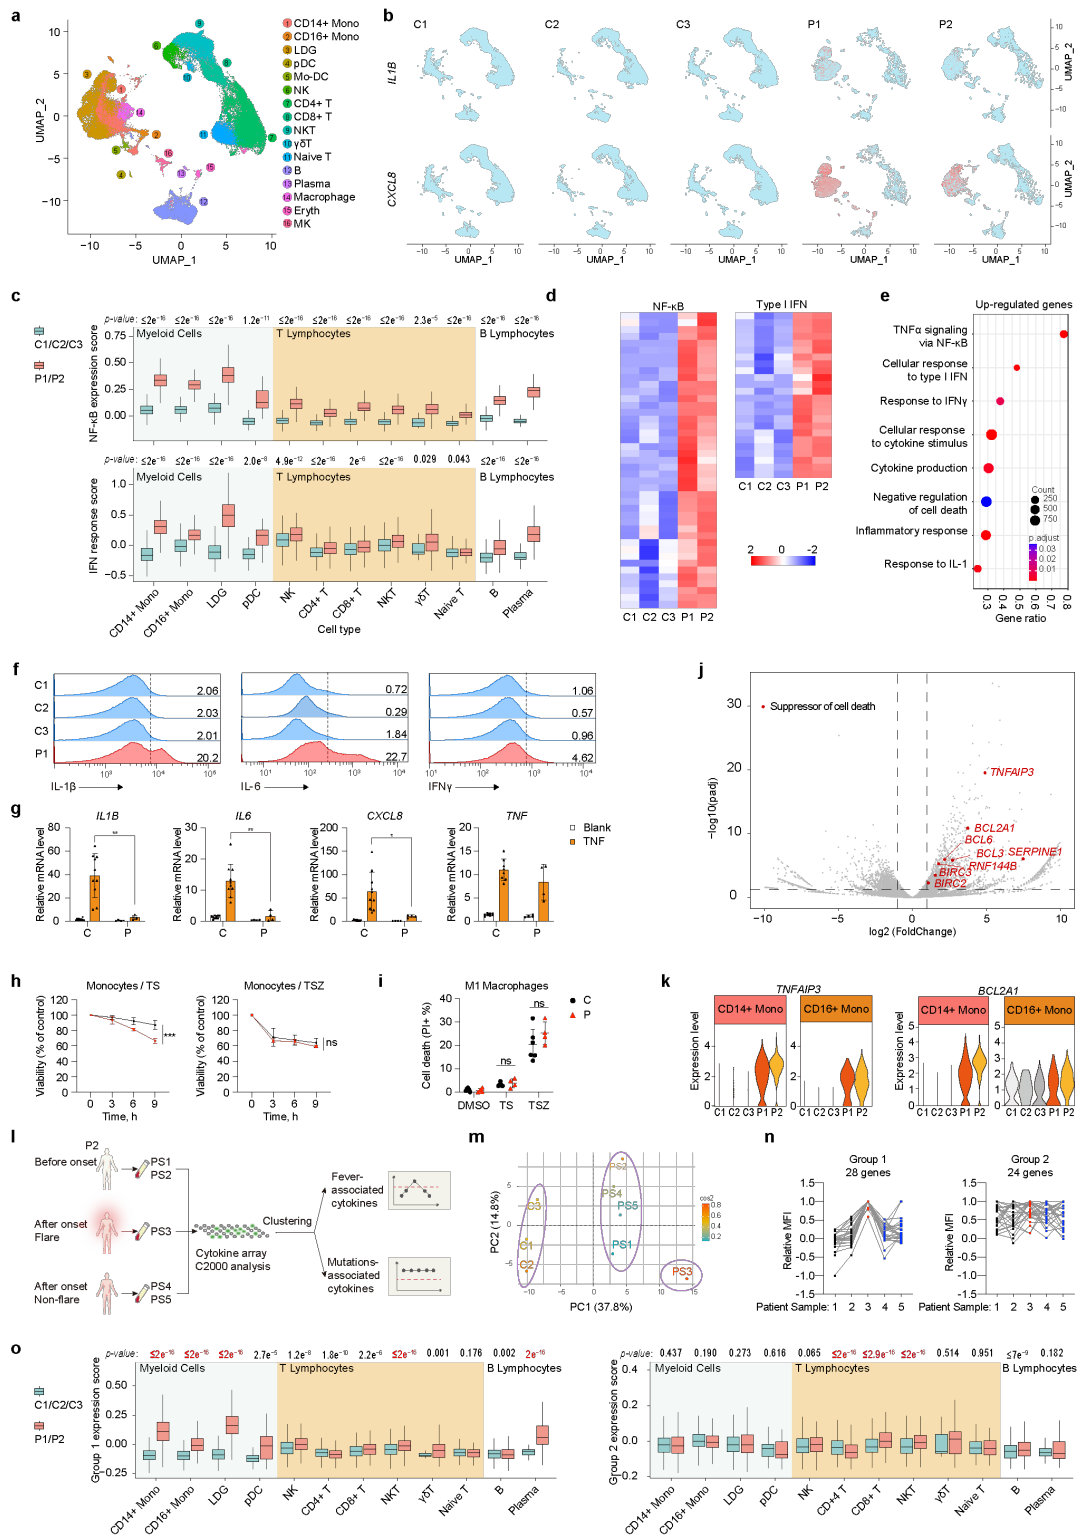

712

713

**Fig. 2 | Strong activation of inflammatory signaling in myeloid cells carrying *RIPK1* mutations.**

714

**a**, Integrated uniform manifold approximation and projection (UMAP) visualization of peripheral blood

715

mononuclear cells (PBMCs) from three unaffected controls (C1, n=13925 cells; C2, n=11117 cells; C3,

716

n=12573 cells) and two patients (P1, n=10918 cells; P2, n=8516 cells), marker-based annotation of 15

717

cell subtypes were colored by cluster identity. LDG, low-density granulocyte; pDC, plasmacytoid

718 dendritic cell; Mo-DC, monocyte-derived dendritic cell; NK, natural killer cell; NKT, natural killer T  
719 cell; Eryth, erythrocyte; MK, megakaryocyte. **b**, Visualization of expressions of *IL1B* and *CXCL8*  
720 (colored single cells) projecting PBMCs from unaffected controls (C1-C3) and two patients (P1 and P2)  
721 on UMAP plots. **c**, Boxplots of the NF- $\kappa$ B expression score (top panel) and IFN response score (bottom  
722 panel) of cell subtypes. **d**, Heatmap of representative genes downstream of NF- $\kappa$ B and type I IFN  
723 pathways in monocyte compartments. Gene names were listed in Extended Data Fig.4d. **e**, Dot plot  
724 showing the biological processes identified with un-regulated gene terms (FDR <0.05) in patients'  
725 monocytes compared to that of unaffected controls using DAVID. The size of the circle indicates the  
726 gene count enriched in the pathway and the color represents pathway enrichment significance. **f**,  
727 Intracellular cytokine analysis of IL-1 $\beta$ , IL-6 and IFN $\gamma$  in monocytes isolated from three unaffected (C1-  
728 C3) controls and P1. **g**, qRT-PCR analysis of *IL1B*, *IL6*, *CXCL8* and *TNF* mRNA levels in primary  
729 monocytes isolated from unaffected controls (n=8-10) and two patients (n=4 from P1 and P2) with or  
730 without 10 ng ml<sup>-1</sup> TNF for 6 hours. **h**, CellTiter-Glo luminescent cell viability detection of primary  
731 monocytes isolated from unaffected controls (n=12) and two patients (n=3 from P1 and P2) stimulated  
732 with T, S, Z for indicated times. **i**, Statistics of dead M1 macrophages stimulated with TS or TSZ for 24  
733 hours by imaging of propidium iodide (PI). M1 macrophages were differentiated from primary  
734 monocytes of unaffected controls (n=6) and two patients (n=4 from P1 and P2). Representative images  
735 were presented in Extended Data Fig.3e. **j**, Volcano plot displaying the differentially expressed genes in  
736 monocyte compartments between three unaffected controls (C1-C3) and two patients (P1 and P2).  
737 Representative suppressive genes of cell death were labeled with red dots and gene names. **k**, Clusters in  
738 the monocyte compartments showing the expression levels of *TNFAIP3* and *BCL2A1* in three unaffected  
739 controls (C1-C3) and two patients (P1 and P2). **l**, Schematic diagram showing serum cytokine microarray  
740 analysis of continuous P2's serum samples before (PS1 and PS2) or after (PS3, flare; PS4 and PS5, non-  
741 flare) the onset of recurrent fever. **m**, PCA analysis of sample variance determined by semi-quantitative  
742 174 cytokines antibody array on serum samples of C1-C3 from three unaffected controls and PS1-PS5  
743 from P2. **n**, The integrated relative MFI plots of P2's serum cytokine levels. 28 cytokines peaked in PS3  
744 were enrich in group 1, 24 cytokines higher than control were enriched in group 2. **o**, Boxplots exhibiting  
745 mRNA expression scores of cytokines of group 1 (left panel) and group 2 (right panel) in indicated cell  
746 compartments. Group 1 and group 2 cytokine panels were clustered with the serum cytokine microarray  
747 analysis in Extended Data Fig.4. T denotes 10 ng ml<sup>-1</sup> TNF; S denotes 250 nM SM164; Z denotes 25  $\mu$ M

748 z-VAD-fmk. All histogram graphs show mean $\pm$ SD. Statistical significance was determined by two-tailed

749 unpaired t-test (**c, g, i, l**) or one-way ANOVA (**h**), ns,  $P > 0.05$ ,  $*P < 0.05$ ,  $**P < 0.01$ ,  $***P < 0.001$ .

750

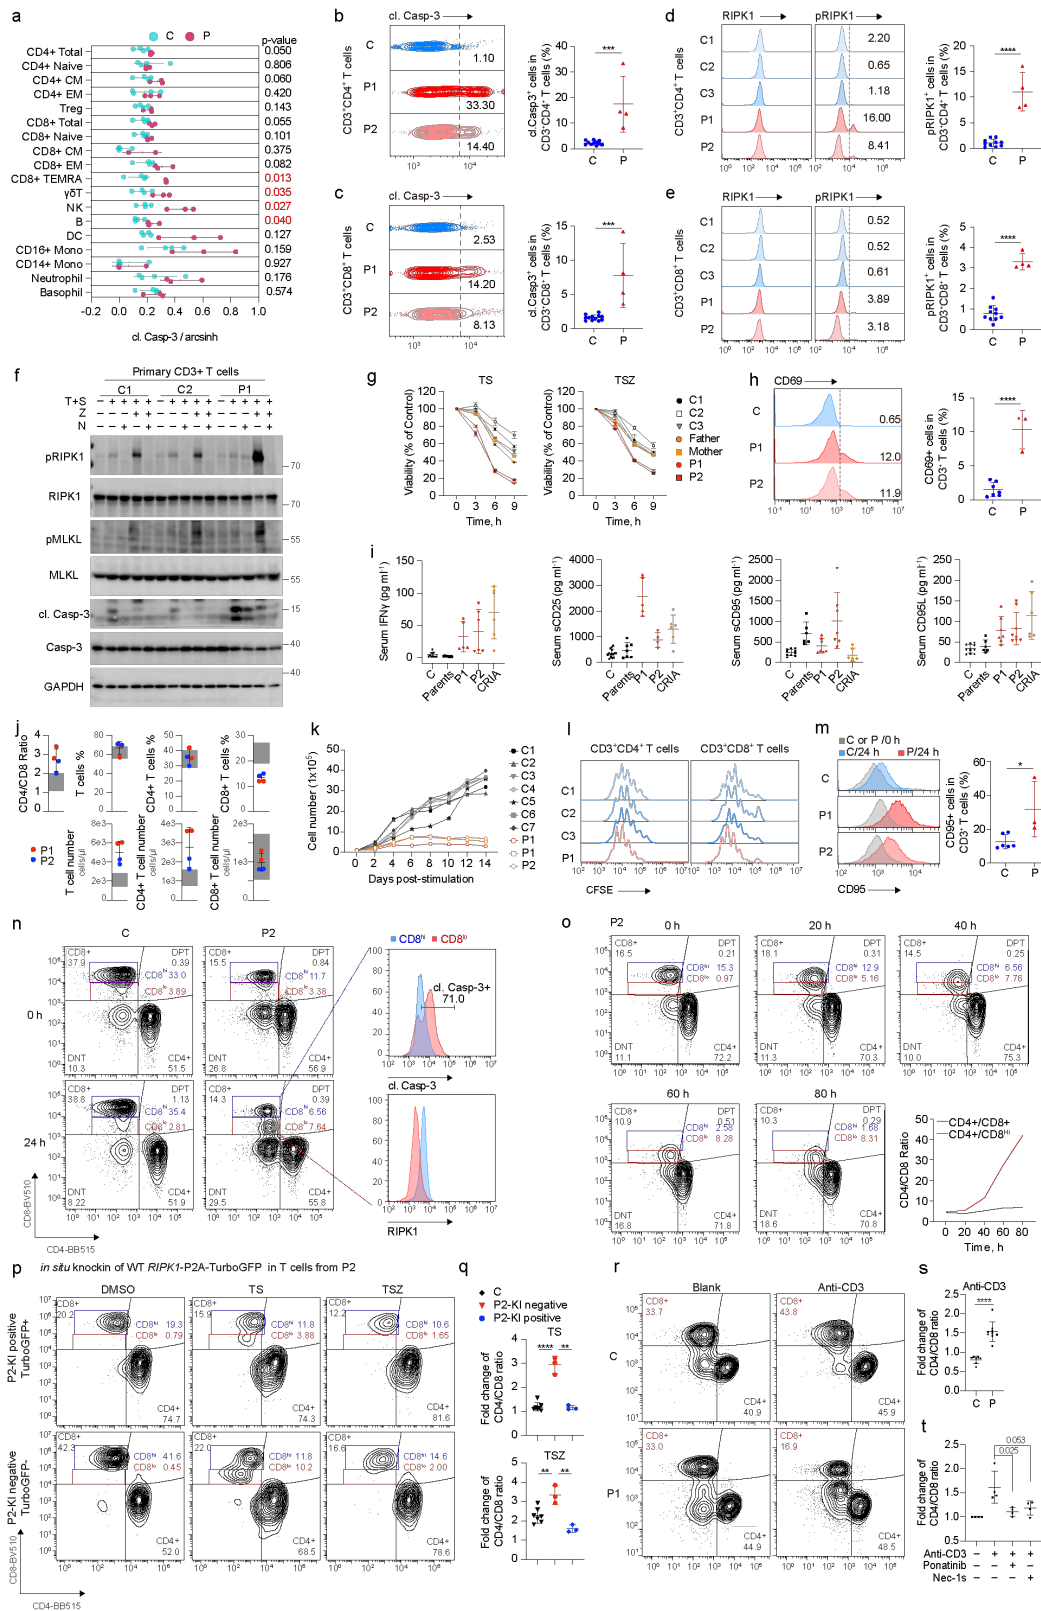

**Fig. 3 | Increased cell death and CD4/CD8 ratio in T cells caused by RIPK1 activation.**

**a**, Average expression values (arcsinh transformed) of cl. Casp-3 across identified peripheral immune cell lineages in PBMCs freshly isolated from four unaffected controls (C) and two patients (P, 1 sample from P1 and 2 samples from P2) by mass cytometry by time-of-flight (CyTOF) analysis. **b-e**,

751

752

753

754

755



756 Representative contour plots of cl. Casp-3 (**b-c**) and histograms of total RIPK1, pRIPK1(S166) (**d-e**)  
757 levels in CD4<sup>+</sup> T and CD8<sup>+</sup> T cells in freshly isolated PBMCs from unaffected controls (n=10-12) and  
758 patients (n=4 for P1 and P2) (left panel). Summary histograms of cl. Casp-3 and pRIPK1(S166) (right  
759 panel) were shown. **f**, Immunoblotting analysis of primary CD3<sup>+</sup> T cells isolated from two unaffected  
760 controls (C1 and C2) and P1 treated with T and S with or without Z, N for 6 hours. Antibodies as indicated  
761 were immunoblotted to show the activation of apoptosis or necroptosis. **g**, CellTiter-Glo luminescent cell  
762 viability detection of primary CD3<sup>+</sup> T cells isolated from three unaffected controls (C1-C3), two patients  
763 (P1 and P2) and their parents treated with TS or TSZ for indicated times, n=4. **h**, Representative  
764 histogram and statistical analysis of surface CD69 expression on CD3<sup>+</sup> T cells from unaffected controls  
765 (n=7) and two patients (n=3 for P1 and P2). **i**, Serum IFN $\gamma$ , sCD25, sCD95 and CD95L of unaffected  
766 controls (C, n=10), two patients (P1, n=5-7; P2, n=4-8) and their parents (n=6-7) as well as two CRIA  
767 syndrome patients (n=6) determined by ELISA. **j**, CD4/CD8 ratio in T cells, percentages and absolute  
768 counts of CD3<sup>+</sup> T, CD4<sup>+</sup> T, CD8<sup>+</sup> T cells in whole blood sample of P1 (red dots) and P2 (blue dots)  
769 measured using immunophenotyping. **k**, *In vitro* expansion of primary T cells isolated from unaffected  
770 controls (n=7) and patients (n=3 for P1 and P2) as indicated. Cell numbers were counted every two days  
771 post anti-CD3/CD28 dynabeads stimulation. **l**, Proliferation of CD4<sup>+</sup> T and CD8<sup>+</sup> T cells isolated from  
772 three unaffected controls (C1-C3) and P1 were analyzed using CFSE staining upon stimulation with anti-  
773 CD3/CD28 dynabeads for 96 hours. **m**, Representative histograms of surface CD95 expression on CD3<sup>+</sup>  
774 T cells analyzed with flow cytometry after culturing *in vitro* for 24 hours. **n**, Representative contour plots  
775 depicting the percentages of CD4<sup>+</sup> T, CD8<sup>+</sup> T, double negative T (DNT) and double positive T (DPT) in  
776 CD3<sup>+</sup> T cells gated from PBMCs of P2 culturing *in vitro* for 24 hours. Histograms displaying cl. Casp-3  
777 and RIPK1 expression levels in CD8<sup>hi</sup> T and CD8<sup>lo</sup> T cells. **o**, Representative contour plots and summary  
778 histograms showing percentages of CD4<sup>+</sup> T, CD8<sup>+</sup> T and CD8<sup>hi</sup> T cells and CD4/CD8 ratio in CD3<sup>+</sup> T  
779 cells isolated from P2 cultured for indicated times. **p-q**, Representative contour plots showing  
780 percentages of CD4<sup>+</sup> T, CD8<sup>+</sup> T in CD3<sup>+</sup> T cells of P2 with (TurboGFP<sup>+</sup>) or without (TurboGFP<sup>-</sup>)  
781 restoration using CRISPR/Cas9-mediated *in situ* knock-in of WT *RIPK1-P2A-TurboGFP* under  
782 stimulation of T with or without S, Z for 6 hours (**p**). CD4/CD8 ratio in CD3<sup>+</sup> T cells of unaffected  
783 controls (n=7) and two patients (n=3 for P1 and P2) were quantified (**q**). **r-s**, Representative contour plots  
784 (**r**) and statistical analysis (**s**) showing percentages of CD4<sup>+</sup> T, CD8<sup>+</sup> T, DNT and DPT cell in CD3<sup>+</sup> T  
785 cells isolated from unaffected control (n=7) and two patients (n=9 for P1 and P2) under the stimulation

786 of anti-CD3 antibody ( $5 \mu\text{g ml}^{-1}$ ) for 72 hours. **t**, Statistical analysis of fold change of CD4/CD8 ratio in  
787 CD3<sup>+</sup> T cells isolated from two patients (n=4 for P1 and P2) under stimulation of anti-CD3 antibody ( $5$   
788  $\mu\text{g ml}^{-1}$ ) with or without 250 nM Ponatinib or 10  $\mu\text{M}$  Nec-1s for 24 hours. For representative contour  
789 plots, see Extended Data Fig. 6h. T denotes 10 ng ml<sup>-1</sup> TNF; S denotes 250 nM SM164; Z denotes 25  
790  $\mu\text{M}$  z-VAD-fmk; N denotes 10  $\mu\text{M}$  Nec-1s. All histogram graphs show mean $\pm$ SD. Statistical significance  
791 was determined by one-way ANOVA (**g**) or two-tailed unpaired t-test in the rest, \* $P < 0.05$ , \*\* $P < 0.01$ ,  
792 \*\*\* $P < 0.001$ , \*\*\*\* $P < 0.0001$ .  
793

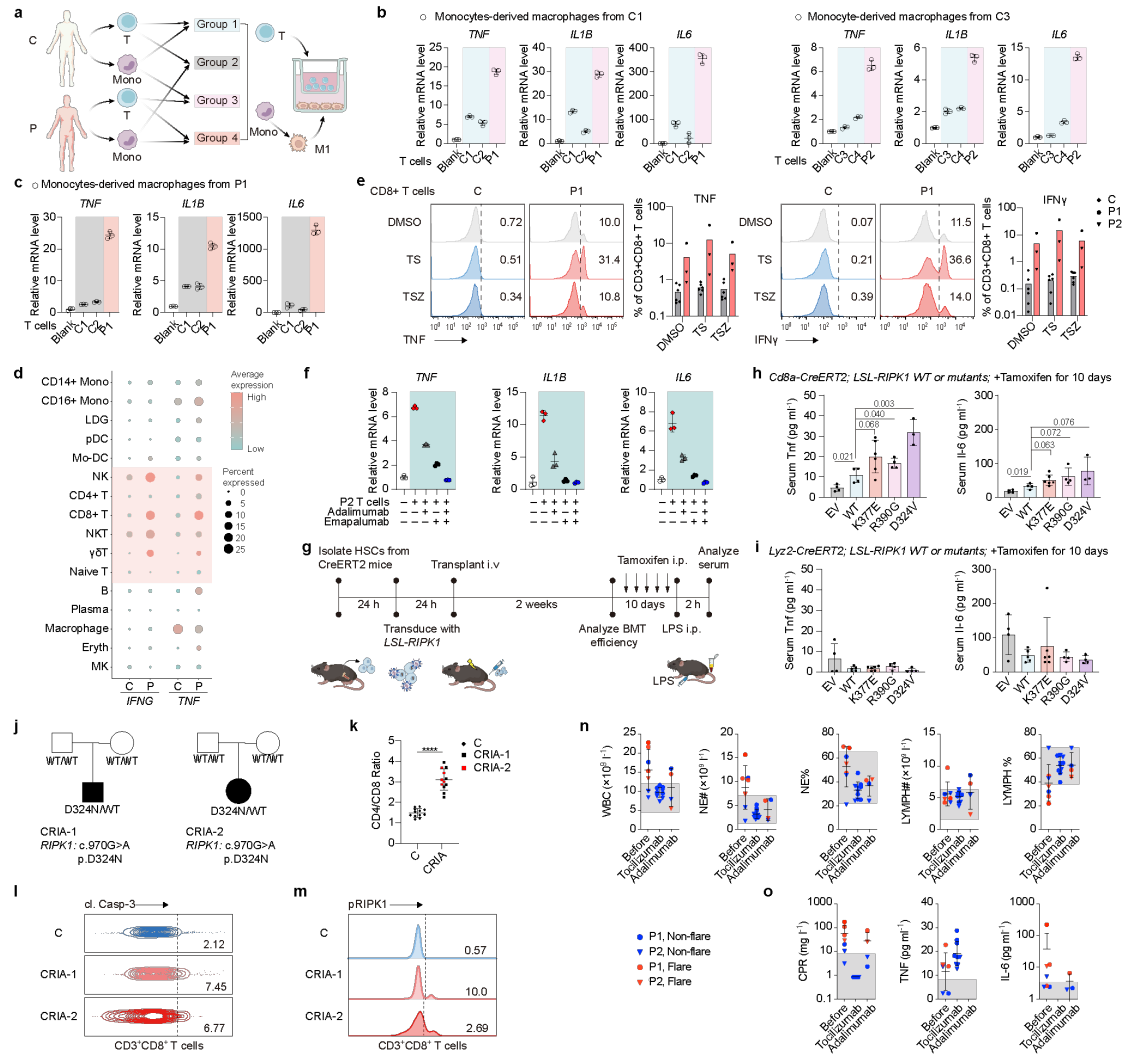

794

795 **Fig. 4** | RIPK1 activation causes inflammation through T-Mono axis.

796 **a**, Schematic diagram of T cell-MDM co-culture system. **b-c**, qRT-PCR analysis of *TNF*, *IL1B* and *IL6*

797 mRNA levels in GM-CSF-activated monocytes derived macrophages (MDMs) co-cultured with or

798 without T cells for 6 hours. GM-CSF-activated MDMs generated from unaffected control 1 (C1) (left

799 panel) or unaffected control 3 (C3) (right panel) (**b**) or P1 (**c**) were co-cultured with donor-matched T

800 cells as well as T cells from other unaffected controls (C2 and C4) or patients as indicated. **d**, Dot plot of

801 *IFNG*, *TNF* in cell subtypes found in scRNA-seq of PBMCs from three unaffected controls and two

802 patients. The size of the circle indicates the percentage of cells positive for gene expression and the color

803 represents the average expression level. **e**, Representative histograms and statistical analysis of TNF and

804 IFN $\gamma$  expression in CD8 $^+$  T cells in PBMCs isolated from unaffected controls (n=6) and patients (n=3

805 for P1 and P2) treated with 10 ng ml $^{-1}$  TNF (T) with or without 250 nM SM-164 (S), 25  $\mu$ M z-VAD-fmk

806 (Z) for 24 hours. **f**, T cells isolated from P2 were co-cultured with MDMs generated from unaffected

807 control in the presence of  $10 \mu\text{g ml}^{-1}$  adalimumab,  $10 \mu\text{g ml}^{-1}$  emapalumab alone or in combination for 6  
808 hours. *TNF*, *IL1B* and *IL6* mRNA levels of MDMs were analyzed by qRT-PCR. **g**, Experimental timeline  
809 for generation of HSCs-transplanted mice with conditional overexpression of human WT or mutated  
810 RIPK1 K377E, R390G or D324V in CD8 $\alpha^+$  T cell- or myeloid cell-specific lineage. **h-i**, ELISA  
811 measurement of serum Tnf and Il6 levels in mice specifically overexpressing WT or mutated hRIPK1 in  
812 CD8 $\alpha^+$  T cells (**h**) or myeloid cells (**i**). **j-m**, Pedigrees of two families with CRIA patients (CRIA-1 and  
813 CRIA-2) (**j**). Patients were represented with filled symbols. Summary histograms of CD4/CD8 ratio in  
814 CD3 $^+$  T cells of unaffected controls (n=12), CRIA-1 (n=7) and CRIA-2 (n=5) were shown (**k**).  
815 Representative contour plots of cl. Casp-3 (**l**) and histograms of pRIPK1(S166) (**m**) protein levels in  
816 CD8 $^+$  T cells in freshly isolated PBMCs from CRIA patients. **n-o**, Whole blood cell counts (WBC), cell  
817 counts and proportions of neutrophil (NE#-NE%) and lymphocyte (LYMPH# -LYMPH%) (**n**), Serum  
818 C-reactive protein (CRP), TNF and IL-6 (**o**) of P1 (red dots) and P2 (blue dots) measured before and  
819 after tocilizumab or adalimumab treatments. The grey area represents the range of unaffected controls.  
820 Dots represent each sample and graphs show mean $\pm$ SD. Statistical significance was determined by two-  
821 tailed unpaired t-test, \* $P < 0.05$ , \*\* $P < 0.01$ , \*\*\* $P < 0.001$ , \*\*\*\* $P < 0.0001$ .  
822

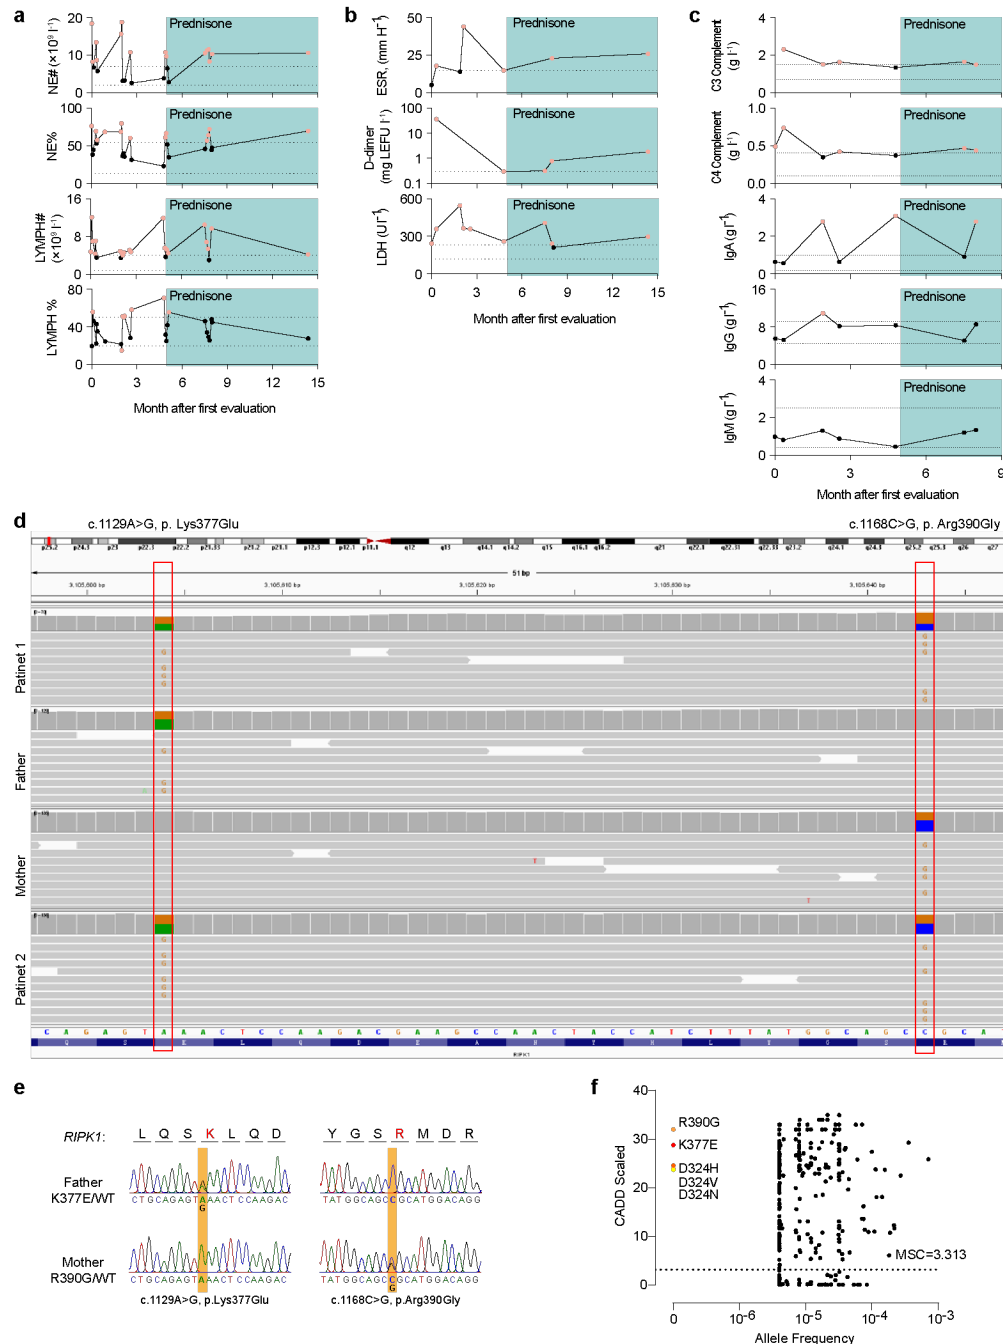

823

824 **Extended Data Fig. 1** | Clinical and genetic information of autoinflammatory patients carrying  
 825 compound heterozygous GOF mutations in *RIPK1*.

826 **a-c**, Cell counts and proportions of neutrophil (NE#-NE%) and lymphocyte (LYMPH# -LYMPH%) (**a**),  
 827 erythrocyte sedimentation rate (ESR), D-dimer, serum lactate dehydrogenases (LDH) (**b**), serum C3  
 828 complement, C4 complement, IgA, IgG, IgM (**c**) measured serially after the first evaluation of P1 and  
 829 prednisone treatment (cyan shading) started at the age between 0-5. Horizontal dotted lines indicating  
 830 age-specific high values for ESR, D-dimer or high and low values for the rest tests. Red dots donate the  
 831 abnormal values. **d**, Whole exome sequencing reads covering *RIPK1* p. Lys377Glu (NM\_003804.4:

832 c.1129A>G) and p. Arg390Gly (NM\_003804.4: c.1168C>G) variants in two patients and their parents  
833 displayed using integrative genomics viewer. **e**, Sanger sequencing chromatograms of *RIPK1* in whole  
834 genomic DNA from parents. **f**, Correlating Combined Annotation Dependent Depletion (CADD) scores  
835 with minor allele frequencies (MAF) for *RIPK1* K377E, R390G and D324 variants. Mutation  
836 significance cutoff (MSC) was show.  
837

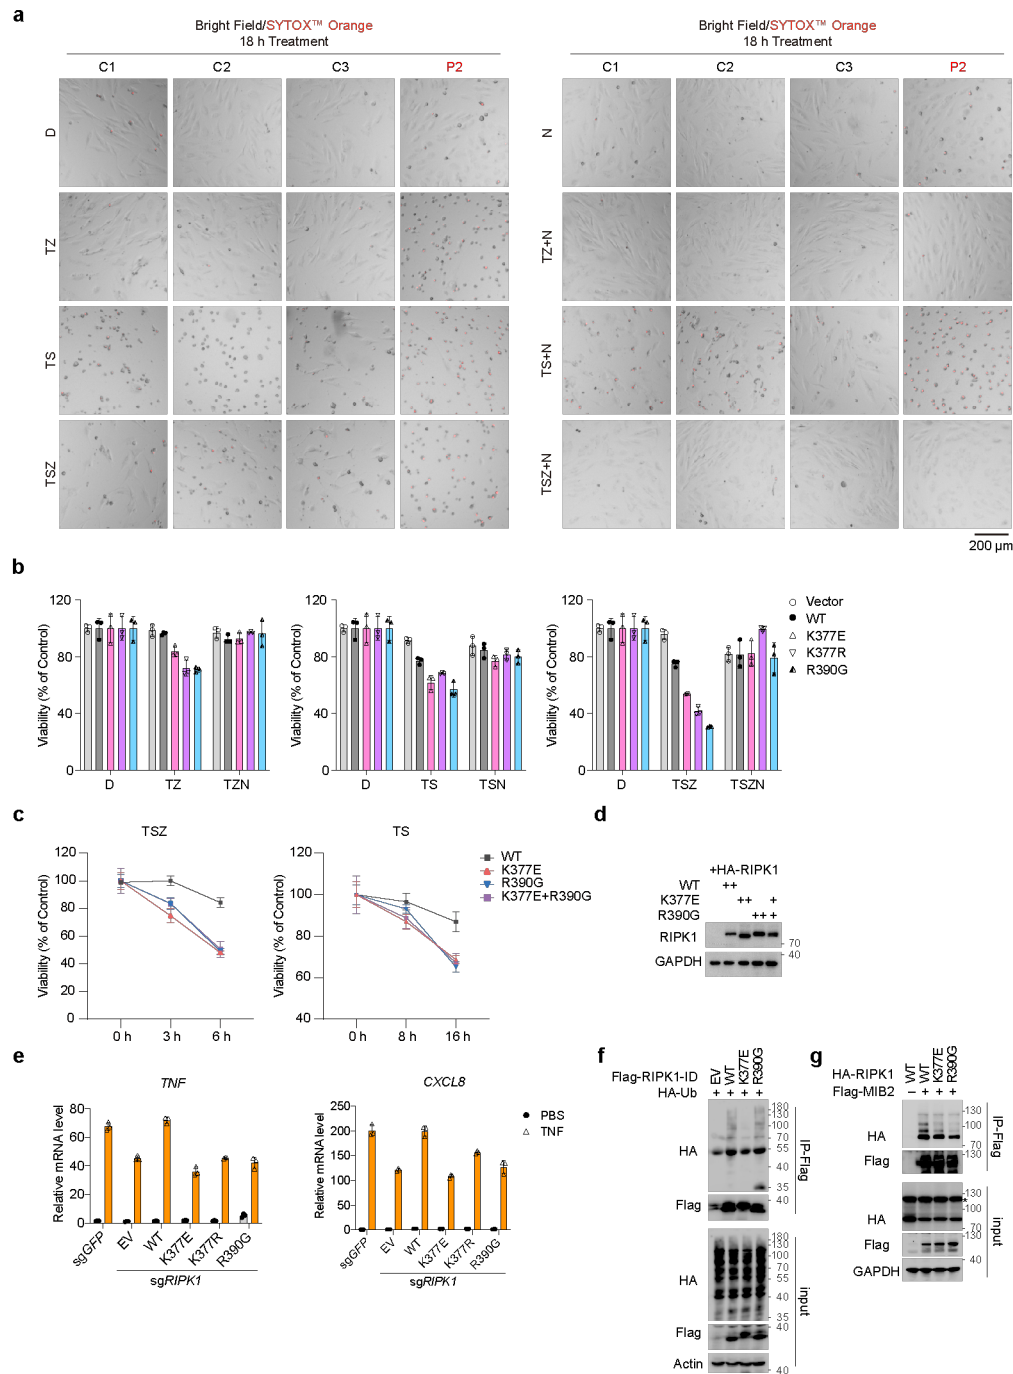

838

839 **Extended Data Fig. 2** | *RIPK1* mutations sensitize cells to TNF-induced cell death.

840 **a**, SV40-HDFs isolated from three unaffected controls (C1-C3) and P2 were treated with T with or  
841 without S, Z and N as indicated. Cell death were monitored by imaging of SYTOX™ Orange staining.

842 **b-d**, CellTiter-Glo luminescent cell viability detection of *RIPK1*<sup>-/-</sup> HT-29 cells complemented with WT  
843 or mutated *RIPK1* K377R, K377E, R390G, K377E/R390G under stimulation of TZ, TS, TSZ with or  
844 without N as indicated (**b-c**). Expression levels of WT or mutated RIPK1 were determined with

845 immunoblot (**d**). **e**, mRNA levels of *TNF*, *CXCL8* in complemented HT-29 cells treated with TNF for 6



846 hours were determined with qRT-PCR. **f-g**, HEK293T cells were transfected with plasmids encoding full  
847 length/intermediate domain of RIPK1 together with MIB2 or Ub as indicated. ID domain of RIPK1 or  
848 MIB2 were immunoprecipitated with anti-Flag dynabeads and immunoblotted with indicated antibodies.  
849 T denotes 20 ng ml<sup>-1</sup> TNF; S denotes 250 nM SM-164; Z denotes 25 μM z-VAD-fmk; N denotes 10 μM  
850 Nec-1s. Graphs show mean±SD.  
851



861 (NES=1.328, P<0.01), NF- $\kappa$ B signaling pathway (NES=2.135, P<0.01) and Type I IFN signaling  
862 pathway (NES=2.023, P<0.01). NES, normalized enrichment score. **e**, Representative images of dead  
863 M1 macrophages in keeping with Fig.2i. **f**, Dot plot of negative regulators of cell death *BCL2A1*, *BCL3*,  
864 *BCL6*, *RNF144B* in cell subtypes found in scRNA-seq of PBMCs from three unaffected controls and two  
865 patients. The size of the circle indicates the percentage of cells positive for gene expression and the color  
866 represents the average expression levels.  
867

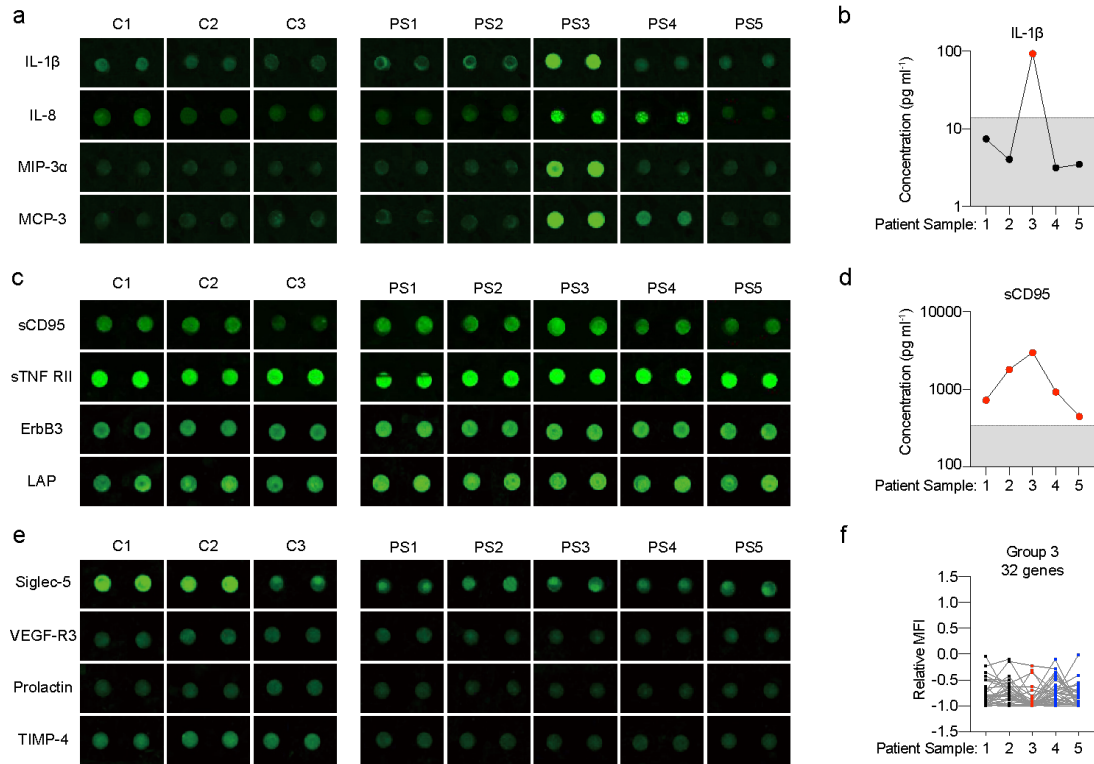

868

869 **Extended Data Fig. 4** | Cytokine array analysis of patient's serum.

870 Images of representative cytokines in group 1 (a), group 2 (c) and group 3 (e-f) clustered from cytokine

871 array data according to Fig. 21-n were presented. Typical cytokines were re-validated with ELISA (b, d)

872 and integrated relative MFI plots of group 3 cytokines were shown.

873

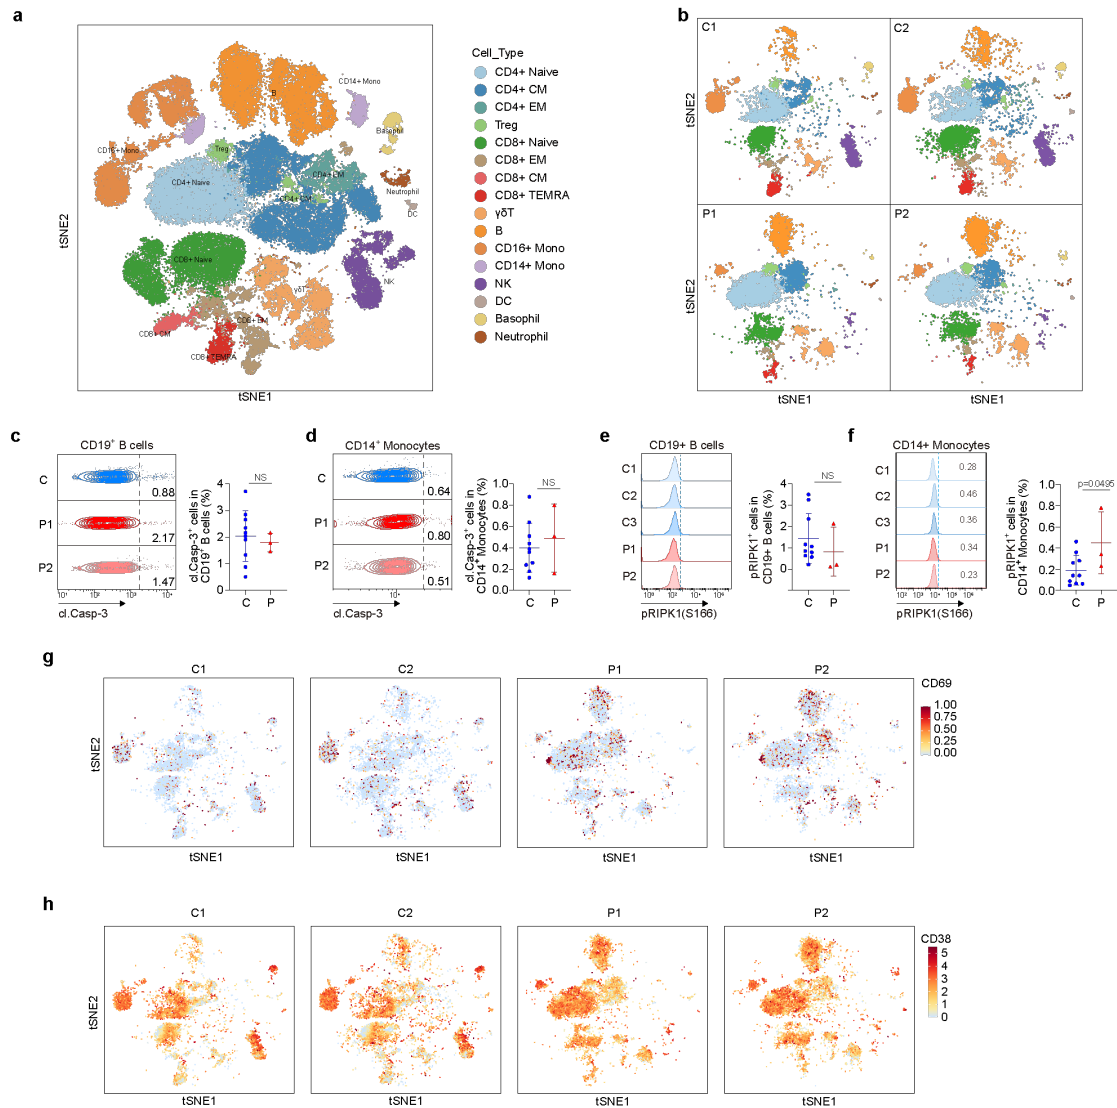

874

875 **Extended Data Fig. 5 |** CyTOF profiling of patients' PBMCs.

876 **a-b,** Integrated t-distributed stochastic neighbor embedding (tSNE) visualization of CyTOF  
 877 immunophenotyping of PBMCs from four unaffected controls and two patients (**a**). Major 16 cell  
 878 lineages from all samples were identified through unsupervised clustering with FlowSOM. tSNE plots  
 879 showing 10000 cells of representative C1, C2, P1 and P2 with color-indicated cell types (**b**). **c-f,**  
 880 Representative contour plots of cl. Casp-3 (**c-d**) and histograms of pRIPK1(S166) (**e-f**) protein levels in  
 881 CD19<sup>+</sup> B cells and CD14<sup>+</sup> monocytes in freshly isolated PBMCs from unaffected controls (n=10) and  
 882 patients (n=3 for P1 and P2) (left panel). Summary histograms were shown with mean±SD (right panel).  
 883 **g-h,** t-distributed stochastic neighbor embedding (tSNE) plot showing the CD69 and CD38 expression  
 884 in CyTOF analysis. Statistical significance was determined by two-tailed unpaired t-test. ns,  $P > 0.05$ ,  
 885 \* $P < 0.05$ , \*\* $P < 0.01$ , \*\*\* $P < 0.001$ .

886

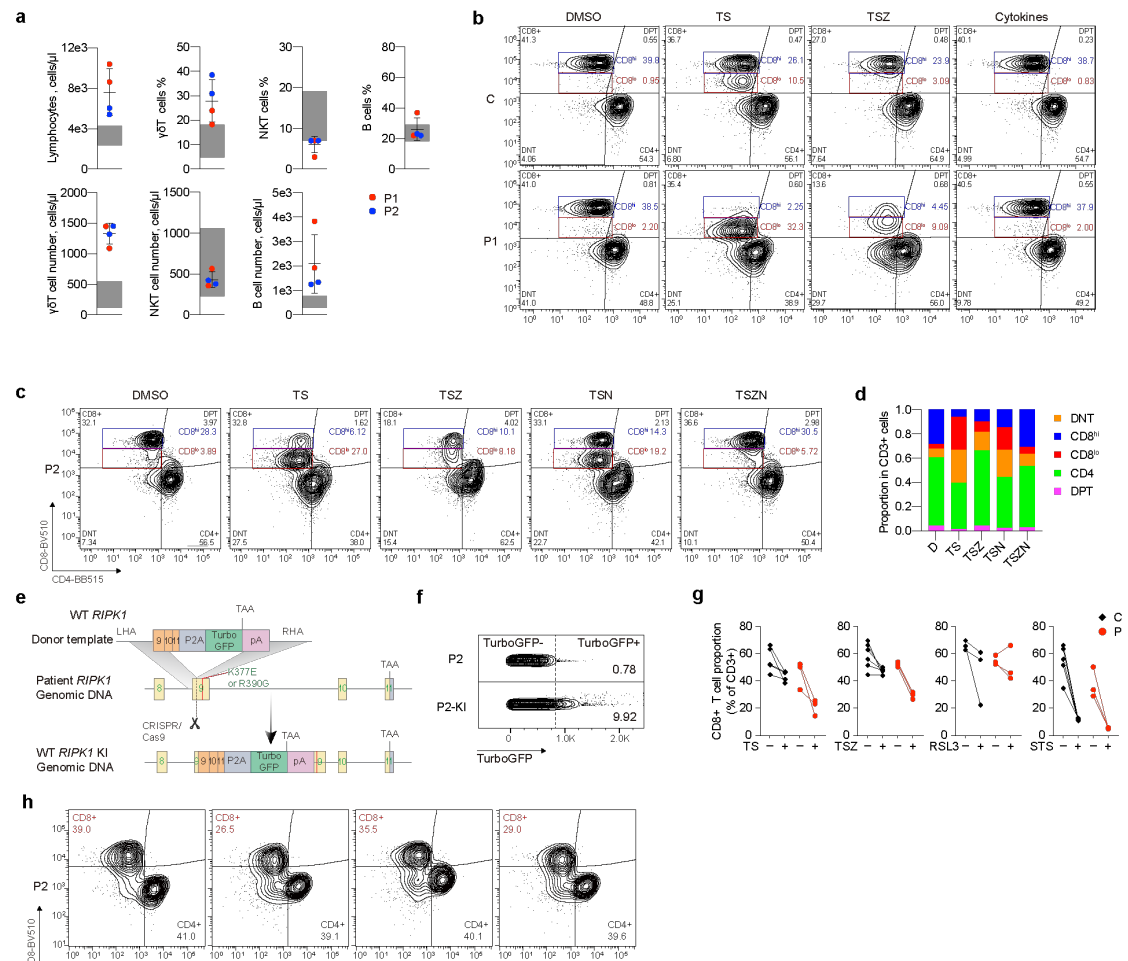

887

888 **Extended Data Fig.6 | RIPK1-mediated cell death leads to CD8 decrease in T cells.**

889 **a**, Percentages and absolute counts of total lymphocytes,  $\gamma\delta$  T cells, NKT cells and B cells from whole  
 890 blood of P1 (red dots) and P2 (blue dots) measured by immunophenotyping. **b**, Representative contour  
 891 plots showing percentages of CD8<sup>hi</sup> T, CD8<sup>lo</sup> T, CD4<sup>+</sup> T, DNT and DPT cells in CD3<sup>+</sup> T cells isolated  
 892 from unaffected control and P1 under the stimulation of TS, TSZ and cytokines (combination of IL-1 $\beta$   
 893 (10 ng ml<sup>-1</sup>), IL-6 (100 ng ml<sup>-1</sup>), IFN $\alpha$  (100 ng ml<sup>-1</sup>) and IL-8 (100 ng ml<sup>-1</sup>)) as indicated for 6 hours. **c**-  
 894 **d**, Representative contour plots (**c**) and summary histogram (**d**) showing percentages of CD8<sup>hi</sup> T, CD8<sup>lo</sup>  
 895 T, CD4<sup>+</sup> T, DNT and DPT cells in CD3<sup>+</sup> T cells isolated from P2 under the stimulation of TS, TSZ, TSN  
 896 and TSZN as indicated for 6 hours. **e**, Schematic of CRISPR/Cas9-mediated *in situ* knock-in of WT  
 897 *RIPK1* into patients' *RIPK1* locus. **f**, Representative contour plots of Turbo-GFP<sup>+</sup> cells percentage  
 898 indicating WT *RIPK1* knockin efficiency. **g**, Statistical analysis of CD8<sup>+</sup> T cell proportions in CD3<sup>+</sup> T  
 899 cells from unaffected controls (n=3-6) and two patients (n=3 for P1 and P2) under the stimulation of TS,  
 900 TSZ as well as RSL3 (1  $\mu$ M) and STS (100 nM) for indicated times. **h**, Representative contour plots  
 901 showing percentages of CD8<sup>+</sup> T and CD4<sup>+</sup> T cells in CD3<sup>+</sup> T cells isolated from P2 under the stimulation

902 of anti-CD3 antibody (5  $\mu\text{g/ml}$ ) with or without Ponatinib (250 nM) and Nec-1s (10  $\mu\text{M}$ ) for 24 hours. T  
903 denotes 20  $\text{ng ml}^{-1}$  TNF; S denotes 250 nM SM-164; Z denotes 25  $\mu\text{M}$  z-VAD-fmk; N denotes 10  $\mu\text{M}$   
904 Nec-1s. Graphs show mean $\pm$ SD.  
905



906

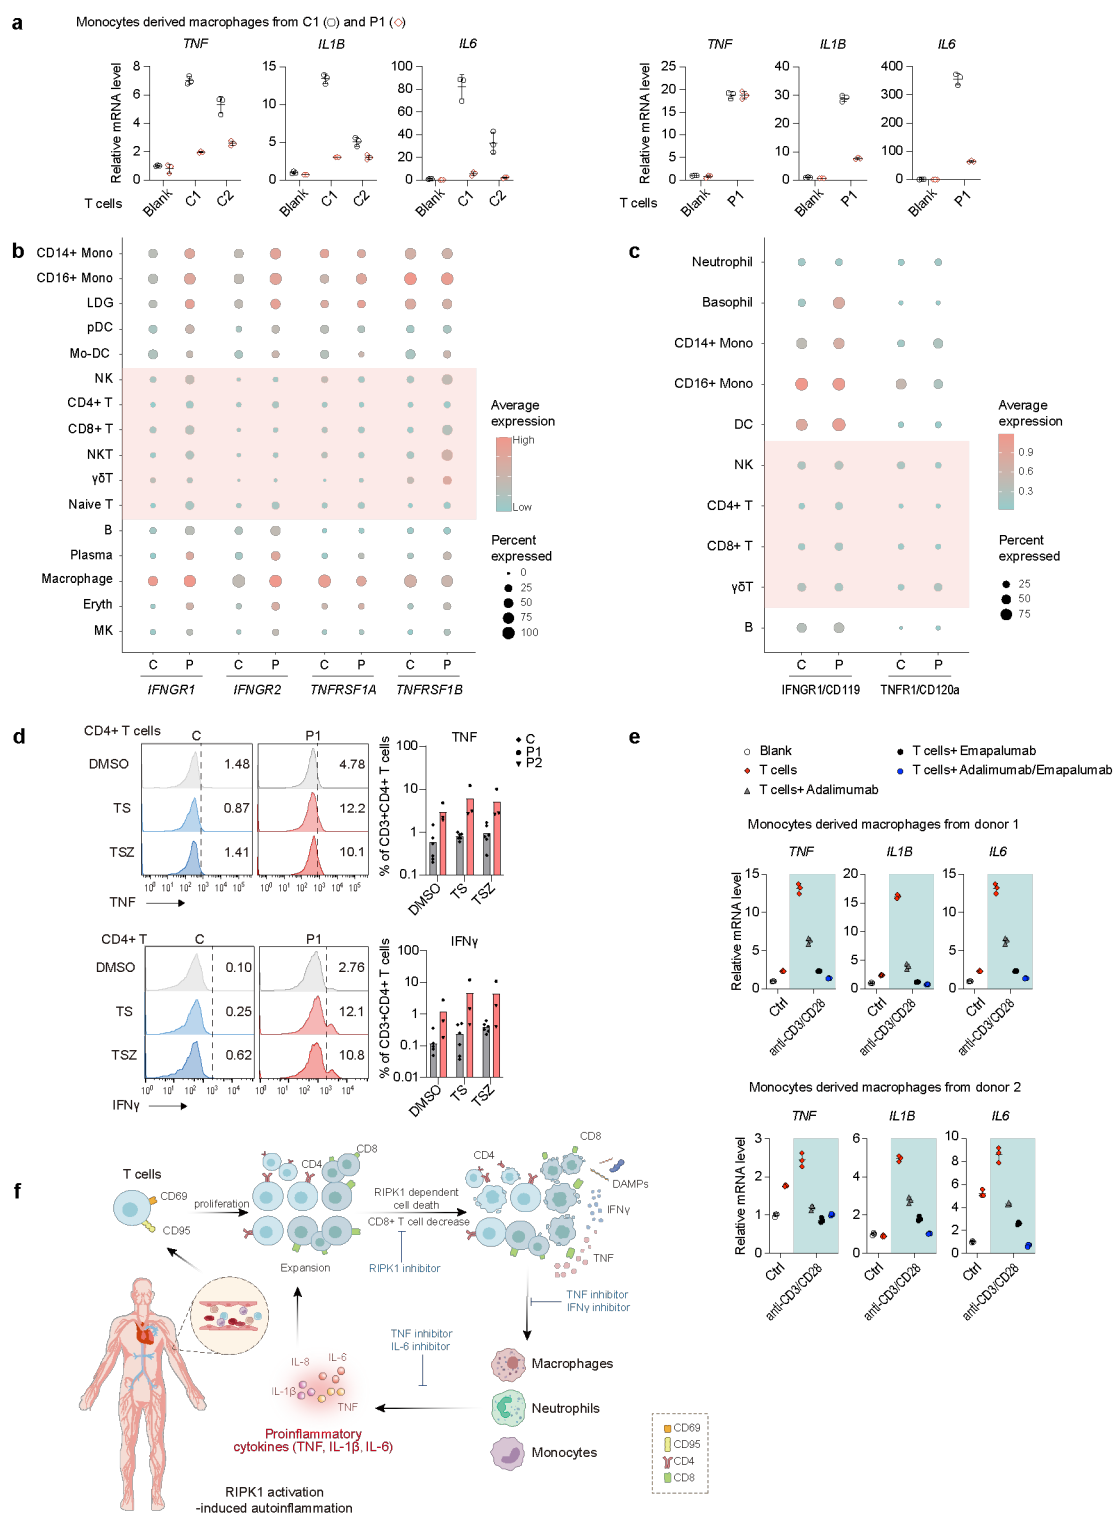

907

908 **Extended Data Fig. 7 | TNF/IFN $\gamma$  links T-mono axis.**

909 **a**, qRT-PCR analysis of *TNF*, *IL1B* and *IL6* mRNA levels in GM-CSF-activated monocytes derived  
 910 macrophages (MDMs) co-cultured with or without T cells for 6 hours. GM-CSF activated MDMs

911 generated from C1 (blank dots) or P1 (red dots) were co-cultured with T cells from unaffected controls  
912 (C1 and C2, left panel) or P1 (right panel) as indicated. **b-c**, Dot plot showing the mRNA expression of  
913 *IFNGR1*, *IFNGR2*, *TNFRSF1A* and *TNFRSF1B* from sc-RNAseq analysis (**b**) or protein levels of  
914 IFNGR1/CD119 and TNFR1/CD120a from CyTOF analysis (**c**) in cell subtypes found in PBMCs. The  
915 size of the circle indicates the percentages of cells positive for gene expression and the color represents  
916 the average expression levels. **d**, Representative histograms and statistical analysis of TNF and IFN $\gamma$   
917 expression in CD4<sup>+</sup> T cells in PBMCs isolated from unaffected controls (n=6) and patients (n=3 for P1  
918 and P2) treated with TS and TSZ for 24 hours. **e**, T cells stimulated with or without anti-CD3/CD28  
919 dynabeads for 24 hours prior to co-culture with MDMs generated from healthy donor 1 (upper panel) or  
920 donor 2 (bottom panel) in the presence of 10  $\mu\text{g ml}^{-1}$  adalimumab, 10  $\mu\text{g ml}^{-1}$  emapalumab alone or in  
921 combination for 6 hours. *TNF*, *IL1B* and *IL6* mRNA levels of MDMs were analyzed by qRT-PCR. **f**,  
922 Working model: RIPK1 activation-dependent CD8<sup>+</sup> T cell death-triggered inflammatory response of  
923 myeloid cells cause SAID. Dots represent each image and graphs show mean $\pm$ SD.  
924

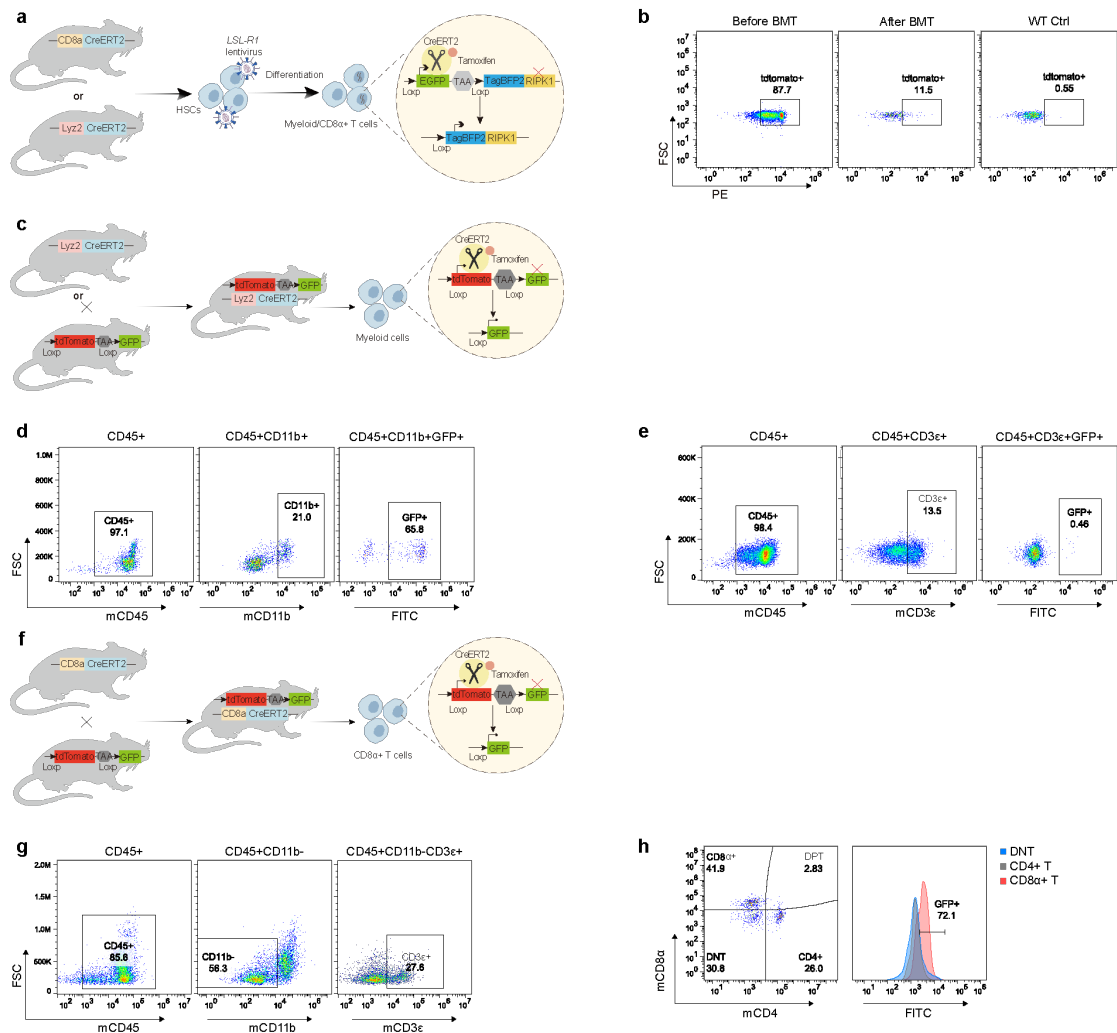

925

926 **Extended Data Fig. 8** | Specificity and efficiency of conditional expression system.

927 **a**, Schematic representation depicting conditional human RIPK1 overexpression system in murine HSC  
 928 used in this study. **b**, Representative contour plots showing the bone marrow transplantation efficiency.  
 929 **c-h**, Schematic representation depicting the generation of double transgenic mice used to evaluate the  
 930 specificity and efficiency of *Lyz2*-CreERT2 (**c**) and *Cd8a*-CreERT2 (**f**). Representative contour plots  
 931 showing percentage of GFP<sup>+</sup> cells in myeloid (**d**) and T lymphoid lineage(**e**), as well as in T cell subsets  
 932 (**g**, **h**) from the whole blood of *Lyz2*-CreERT2::*Rosa26*-mTmG and *Cd8a*::*Rosa26*-mTmG mice with  
 933 tamoxifen induction.

934

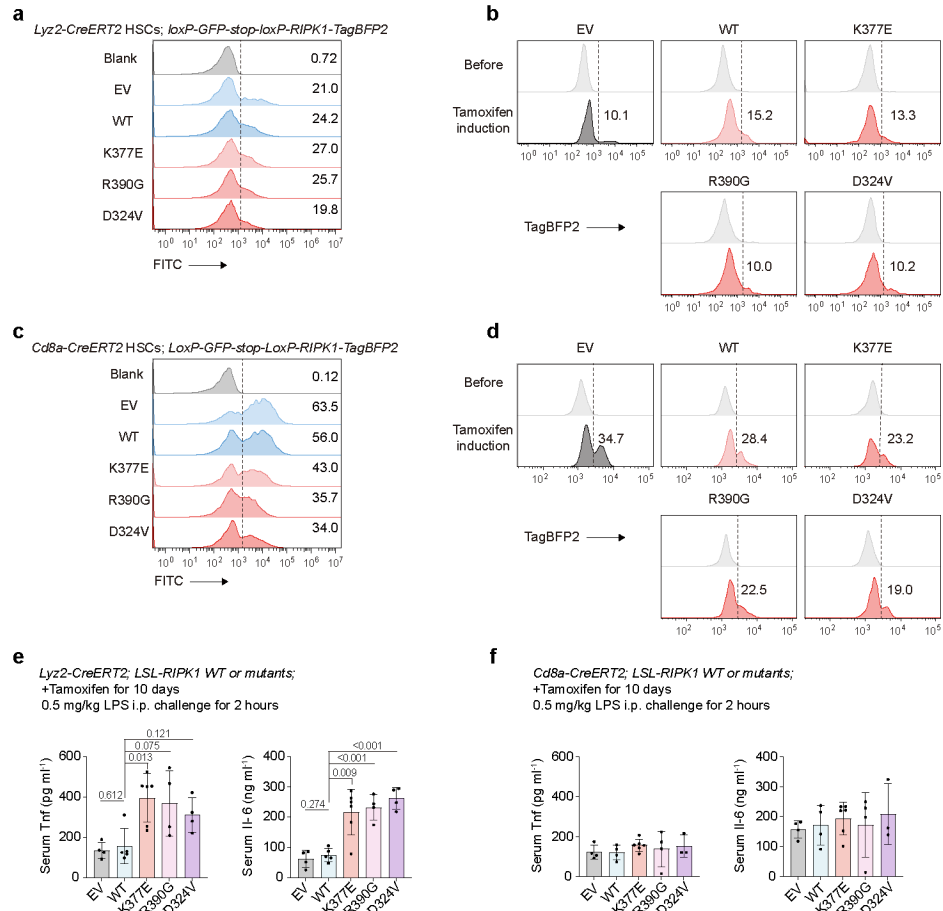

935

936 **Extended Data Fig. 9** | Efficiency of conditionally induced overexpression of RIPK1 in mice.

937 **a-d**, *loxP-GFP-stop-loxP-TagBFP2-P2A-WT/mutated human RIPK1* were lentivirally transduced into  
 938 HSCs isolated from *Lyz2-CreERT2* (**a**) or *Cd8a-CreERT2* donor mice (**c**). Histogram graphs showing  
 939 expression levels of GFP in HSCs. Whole blood cells isolated from recipient mice with *Lyz2-CreERT2*  
 940 (**b**) and *Cd8a-CreERT2* (**d**) HSCs transplantation before and after tamoxifen induction. Histogram graphs  
 941 showing expression levels of TagBFP2 in myeloid cells (**b**) and CD8 $\alpha^+$  T cells (**d**). **e-f**, ELISA  
 942 measurement of serum Tnf and Il-6 levels in mice specifically overexpressing WT or mutated hRIPK1  
 943 in myeloid cells (**e**) or CD8 $\alpha^+$  T cells (**f**) with 0.5 mg/kg LPS challenge for 2 hours. Statistical significance  
 944 was determined by two-tailed unpaired t-test.

945

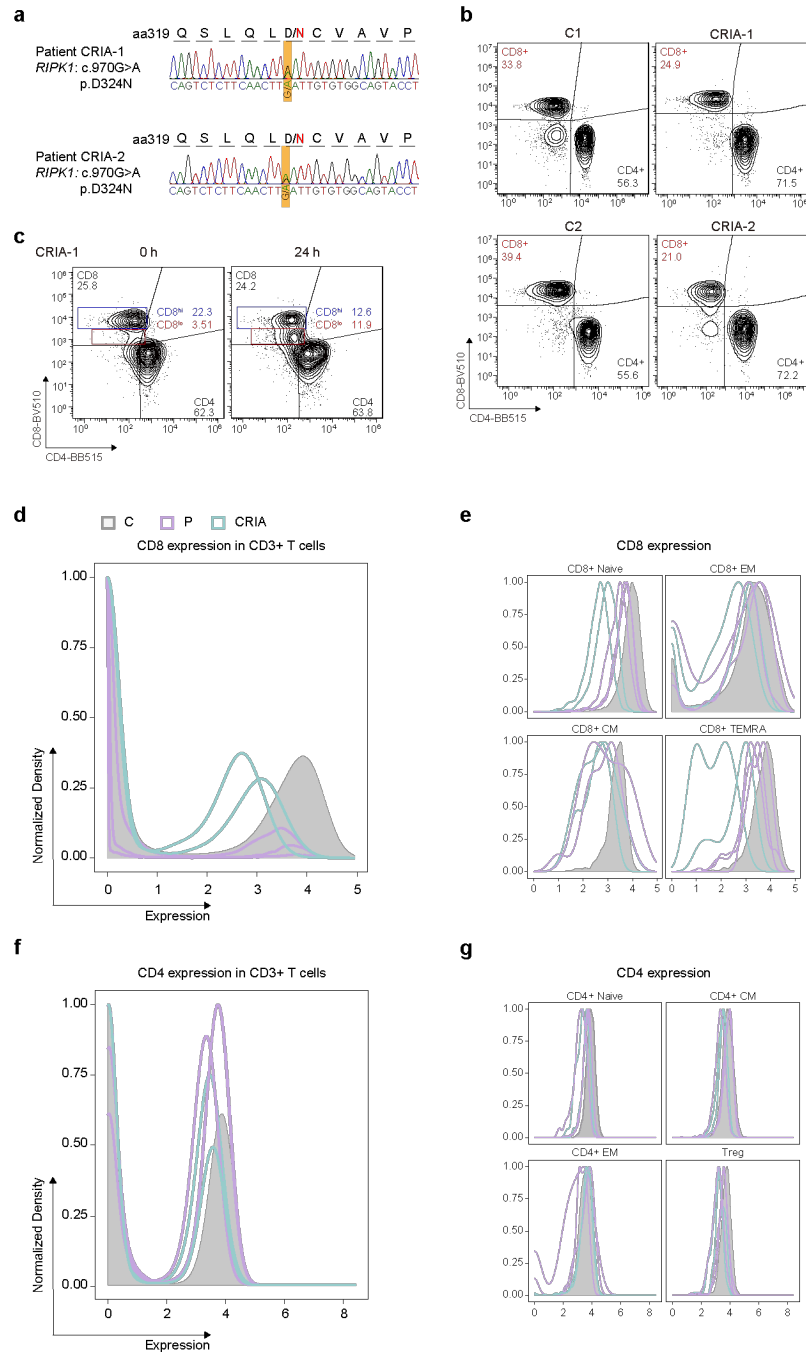

946

947 **Extended Data Fig. 10** | CD8 expression in CRIA patients.

948 **a**, Sanger sequencing chromatograms of *RIPK1* in whole blood genomic DNA from CRIA patients  
 949 (CRIA-1 and CRIA-2). **b**, Representative contour plots showing percentages of CD4<sup>+</sup> T and CD8<sup>+</sup> T cells  
 950 in CD3<sup>+</sup> T cells isolated from CRIA patients. **c**, Representative contour plots depicting the percentages  
 951 of CD4<sup>+</sup> T, CD8<sup>+</sup> T, double negative T (DNT) and double positive T (DPT) in CD3<sup>+</sup> T cells gated from  
 952 PBMCs of CRIA-1 culturing *in vitro* for 24 hours. **d-g**, Contour plots showing the expression of CD8 (**d**)  
 953 or CD4 (**f**) in CD3<sup>+</sup> T cells, CD8<sup>+</sup> (**e**) and CD4<sup>+</sup> (**g**) T cell subsets of four unaffected controls, two patients  
 954 (P1 and P2) and two CRIA patients. The protein expression was determined using CyTOF.
